# Supplementary material for: Echinocystic Acid Bidesmoside Saponins from Microglossa afzelii O. Hoffm and Their Cytotoxic Activity against the CAL-27 Oral Squamous Carcinoma Cell Line
Source: Metabolites. 2022 Oct 25;12(11):1018. doi: 10.3390/metabo12111018 (PMC9694296; doi:10.3390/metabo12111018)
Supplement: Supplementary file 1 [file metabolites-12-01018-s001.zip › metabolites-1955665-supplementary.pdf]

## Supporting information

# Echinocystic Acid Bidesmoside Saponins from *Microglossa afzelii* O. Hoffm and Their Cytotoxic Activity against the CAL-27 Oral Squamous Carcinoma Cell Line

Billy Toussie Tchegnitegni <sup>1,2,\*</sup>, Tehmina Ahmed <sup>3</sup>, Francis Tatong Ngouafong <sup>1</sup>,  
Viviane Flore Kamlo Kamso <sup>4</sup>, Rémy Bertrand Teponno <sup>1</sup>, Bruno Ndjakou Lenta <sup>5</sup>,  
Léon Azefack Tapondjou <sup>1</sup>, Arslan Ali <sup>3</sup> and Syed Ghulam Musharraf <sup>2,\*</sup>

<sup>1</sup> Department of Chemistry, Faculty of Science, University of Dschang,  
Dschang P.O. Box 67, Cameroon

<sup>2</sup> HEJ, Research Institute of Chemistry, International Center for Chemical and Biological  
Sciences, University of Karachi, Karachi 75270, Pakistan

<sup>3</sup> Panjwani Center for Molecular Medicine and Drug Research, International Center for  
Chemical and Biological Sciences, University of Karachi, Karachi 75270, Pakistan

<sup>4</sup> Department of Organic Chemistry, Faculty of Science, University of Yaoundé I,  
Yaoundé P.O. Box 812, Cameroon

<sup>5</sup> Department of Chemistry, Higher Teacher Training College, University of Yaoundé I,  
Yaoundé P.O. Box 47, Cameroon

\* Correspondence: billytoussie@yahoo.fr (B.T.T.); musharraf1977@yahoo.com (S.G.M.)

## TABLE OF CONTENTS

**Figure S1.** HRFABMS spectrum of compound **1**

**Figure S2.** IR spectrum of compound **1**

**Figure S3.**  $^1\text{H}$  NMR (600 MHz,  $\text{CD}_3\text{OD}$ ) spectrum of compound **1**

**Figure S4.**  $^{13}\text{C}$  NMR (150 MHz,  $\text{CD}_3\text{OD}$ ) spectrum of compound **1**

**Figure S5.** DEPT 135 spectrum of compound **1**

**Figure S6.** DEPT 90 spectrum of compound **1**

**Figure S7.**  $^1\text{H}$ – $^1\text{H}$  COSY spectrum of compound **1**

**Figure S8.** ROESY spectrum of compound **1**

**Figure S9.** TOCSY spectrum of compound **1**

**Figure S10.** HSQC spectrum of compound **1**

**Figure S11.** HMBC spectrum of compound **1**

**Figure S12.** HRFABMS spectrum of compound **2/3**

**Figure S13.** IR spectrum of compound **2/3**

**Figure S14.**  $^1\text{H}$  NMR (600 MHz,  $\text{CD}_3\text{OD}$ ) spectrum of compound **2/3**

**Figure S15.**  $^{13}\text{C}$  NMR (150 MHz,  $\text{CD}_3\text{OD}$ ) spectrum of compound **2/3**

**Figure S16.** DEPT 135 spectrum of compound **2/3**

**Figure S17.** DEPT 90 spectrum of compound **2/3**

**Figure S18.**  $^1\text{H}$ – $^1\text{H}$  COSY spectrum of compound **2/3**

**Figure S19.** NOESY spectrum of compound **2/3**

**Figure S20.** TOCSY spectrum of compound **2/3**

**Figure S21.** HSQC spectrum of compound **2/3**

**Figure S22.** HMBC spectrum of compound **2/3**

**Figure S23.** HRFABMS spectrum of compound **4/5**

**Figure S24.** ESI-MS<sup>2</sup> spectrum of  $m/z = 1099.6$  of compound **4/5**

**Figure S25.** ESI-MS<sup>3</sup> spectrum of  $m/z = 647.4$  of compound **4/5**

**Figure S26.** IR spectrum of compound **4/5**

**Figure S27.** <sup>1</sup>H NMR (600 MHz, CD<sub>3</sub>OD) spectrum of compound **4/5**

**Figure S28.** <sup>13</sup>C NMR (150 MHz, CD<sub>3</sub>OD) spectrum of compound **4/5**

**Figure S29.** DEPT 135 spectrum of compound **4/5**

**Figure S30.** DEPT 90 spectrum of compound **4/5**

**Figure S31.** <sup>1</sup>H–<sup>1</sup>H COSY spectrum of compound **4/5**

**Figure S32.** NOESY spectrum of compound **4/5**

**Figure S33.** TOCSY spectrum of compound **4/5**

**Figure S34.** HSQC spectrum of compound **4/5**

**Figure S35.** HMBC spectrum of compound **4/5**

**Figure S36.** HRFABMS spectrum of compounds **6–8**

**Figure S37.** IR spectrum of compound **6–8**

**Figure S38.** <sup>1</sup>H NMR (800 MHz, CD<sub>3</sub>OD) spectrum of compound **6–8**

**Figure S39.** <sup>13</sup>C NMR (200 MHz, CD<sub>3</sub>OD) spectrum of compound **6–8**

**Figure S40.** DEPT 135 spectrum of compound **6–8**

**Figure S41.** DEPT 90 spectrum of compound **6–8**

**Figure S42.**  $^1\text{H}$ – $^1\text{H}$  COSY spectrum of compound **6–8**

**Figure S43.** NOESY spectrum of compound **6–8**

**Figure S44.** HSQC spectrum of compound **6–8**

**Figure S45.** HBMC spectrum of compound **6–8**

**Figure S46.** HRFABMS spectrum of compound **9**

**Figure S47.**  $^1\text{H}$  NMR (600 MHz,  $\text{CD}_3\text{OD}$ ) spectrum of compound **9**

**Figure S48.**  $^{13}\text{C}$  NMR (150 MHz,  $\text{CD}_3\text{OD}$ ) spectrum of compound **9**

**Figure S49.** DEPT 135 spectrum of compound **9**

**Figure S50.** DEPT 90 spectrum of compound **9**

**Figure S51.** Cell viability of all tested compounds.

| Measured<br>MASS | Theoretical<br>MASS | Delta<br>[ppm] | Delta<br>[mmu] | RDB  | Composition |
|------------------|---------------------|----------------|----------------|------|-------------|
| 1245.6211        | 1245.6209           | 0.1            | 0.2            | 22.5 | C68 H93 O21 |
|                  | 1245.6268           | -4.6           | -5.7           | 13.5 | C61 H97 O26 |
|                  | 1245.6057           | 12.4           | 15.4           | 18.5 | C64 H93 O24 |
|                  | 1245.6421           | -16.8          | -21            | 17.5 | C65 H97 O23 |
|                  | 1245.6573           | -29.1          | -36.2          | 21.5 | C69 H97 O20 |

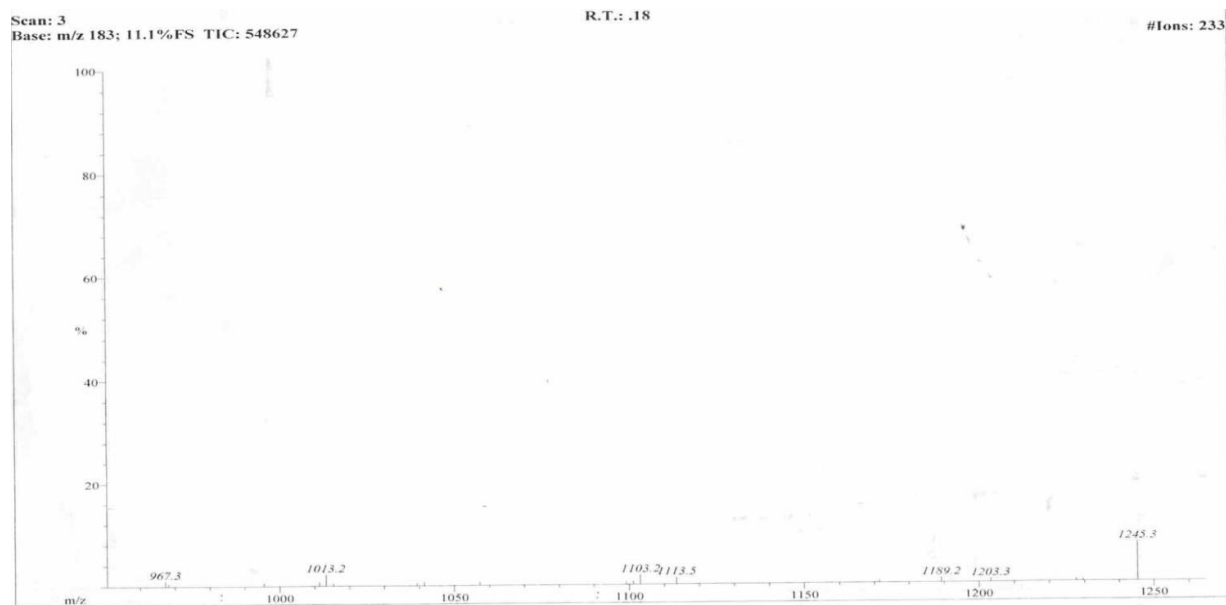

**Figure S1.** HRFABMS spectrum of compound **1**

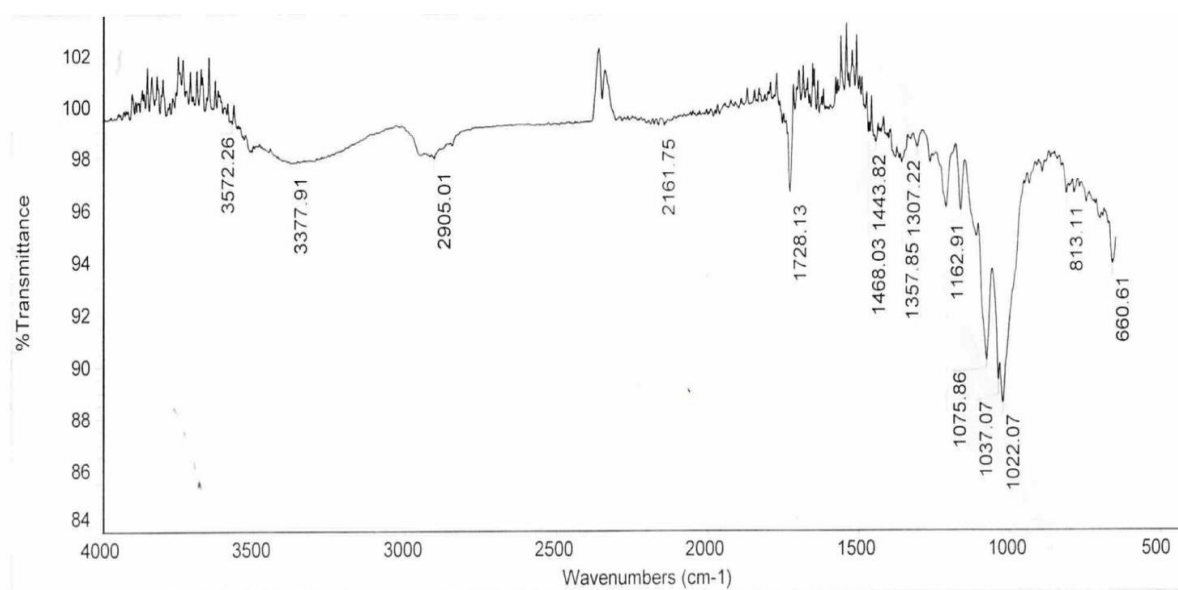

**Figure S2.** IR spectrum of compound **1**

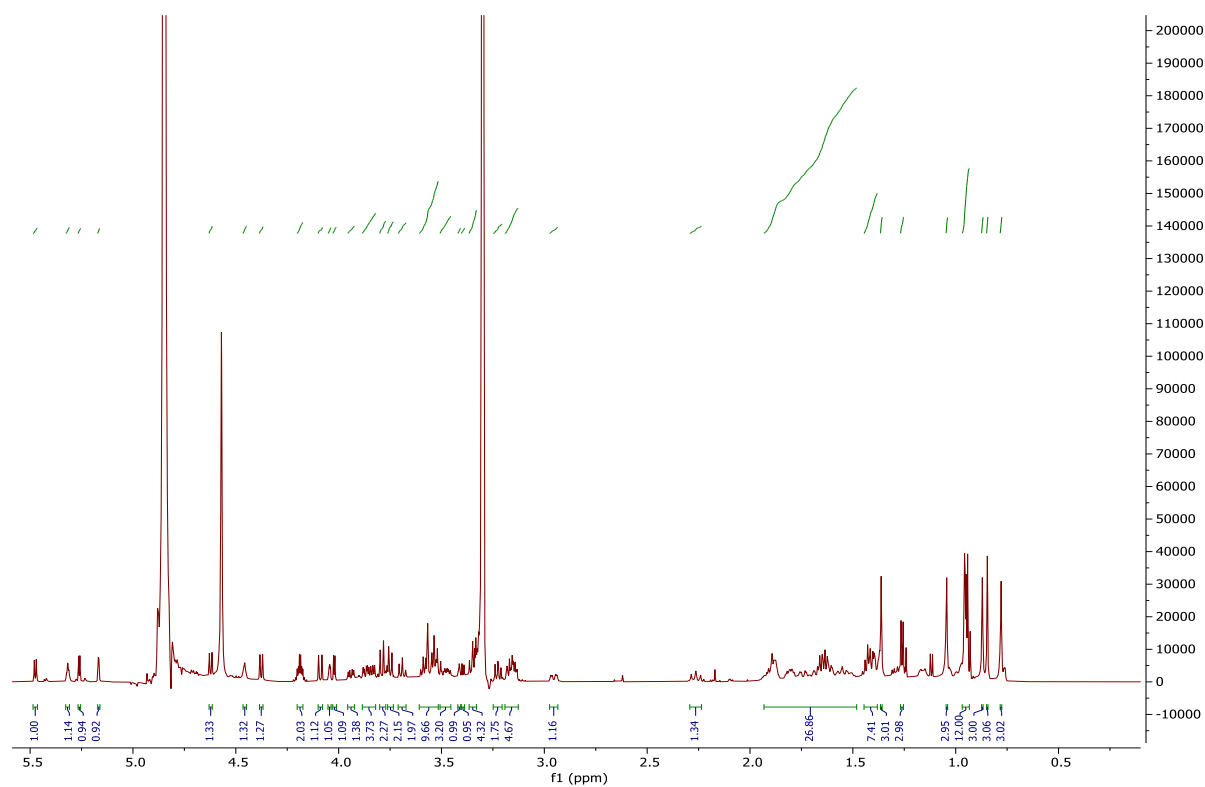

**Figure S3.** <sup>1</sup>H NMR (600 MHz, CD<sub>3</sub>OD) spectrum of compound **1**

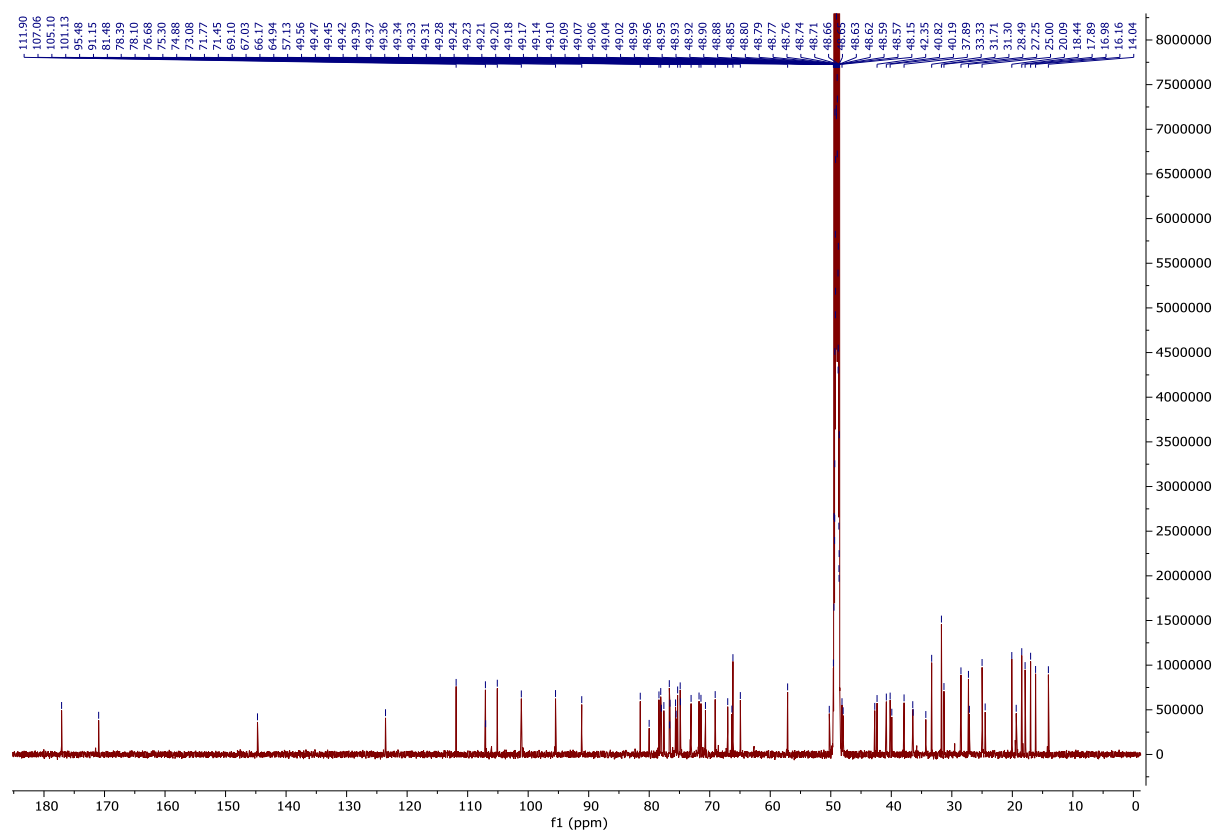

**Figure S4.** <sup>13</sup>C NMR (150 MHz, CD<sub>3</sub>OD) spectrum of compound **1**

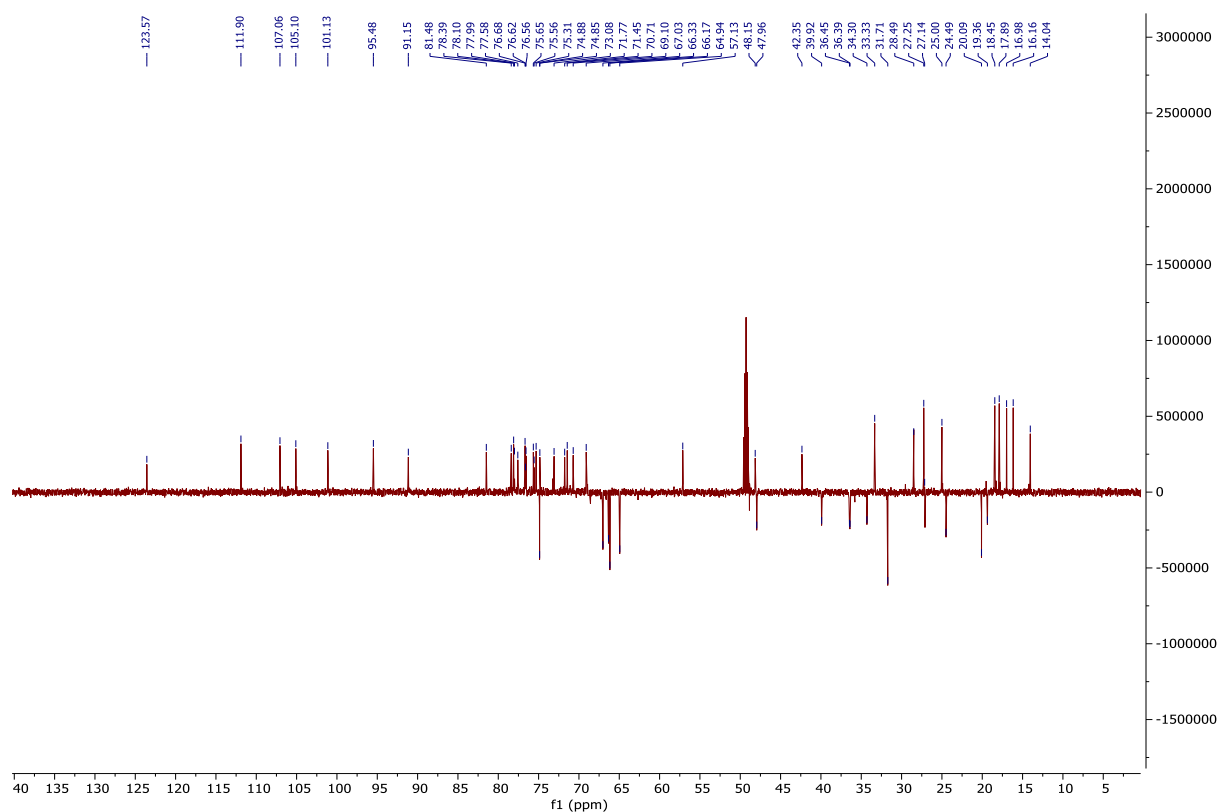

**Figure S5.** DEPT 135 spectrum of compound **1**

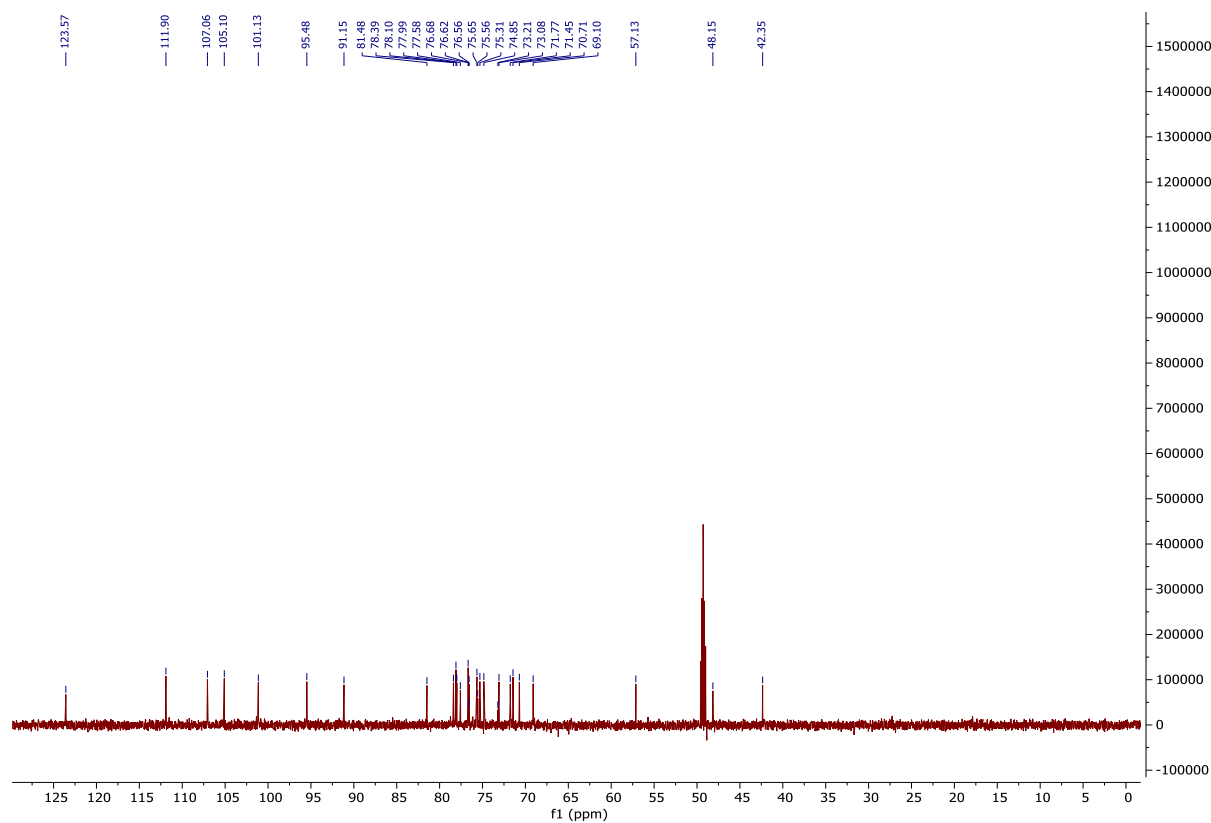

**Figure S6:** DEPT 90 spectrum of compound **1**



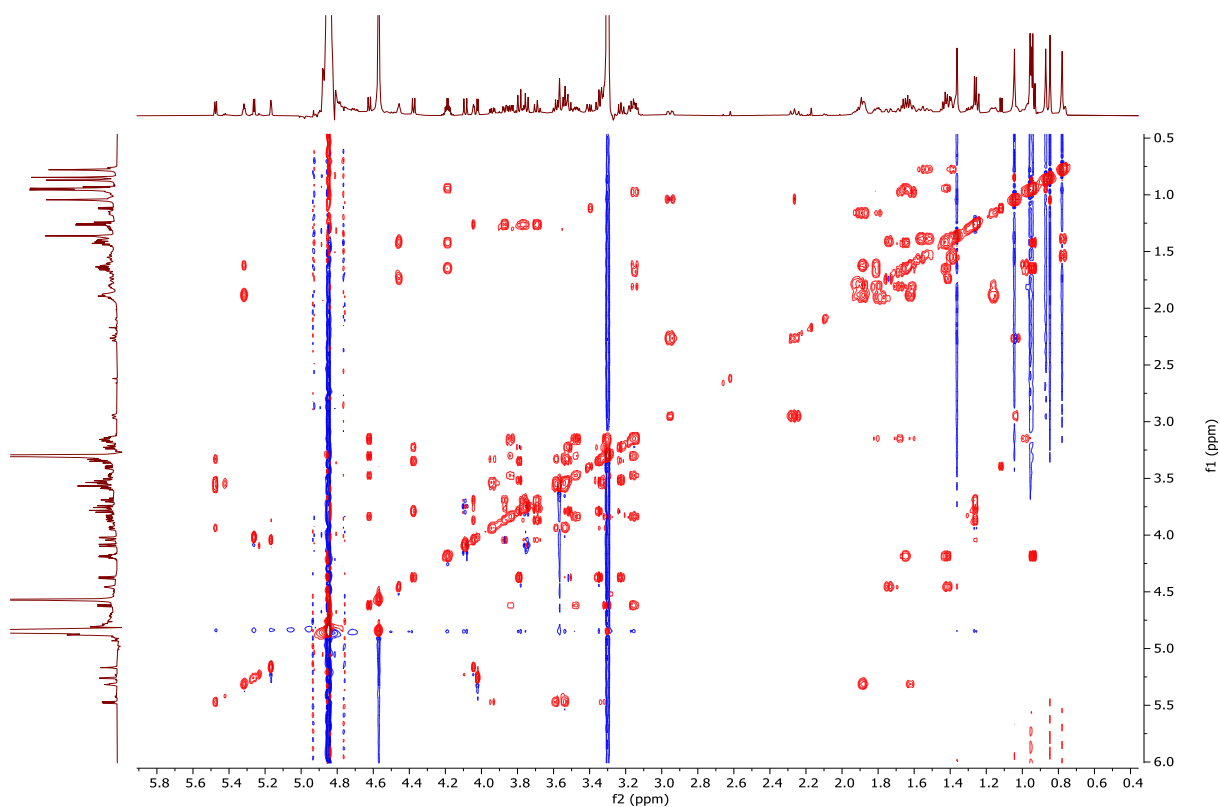

**Figure S9.** TOCSY spectrum of compound **1**

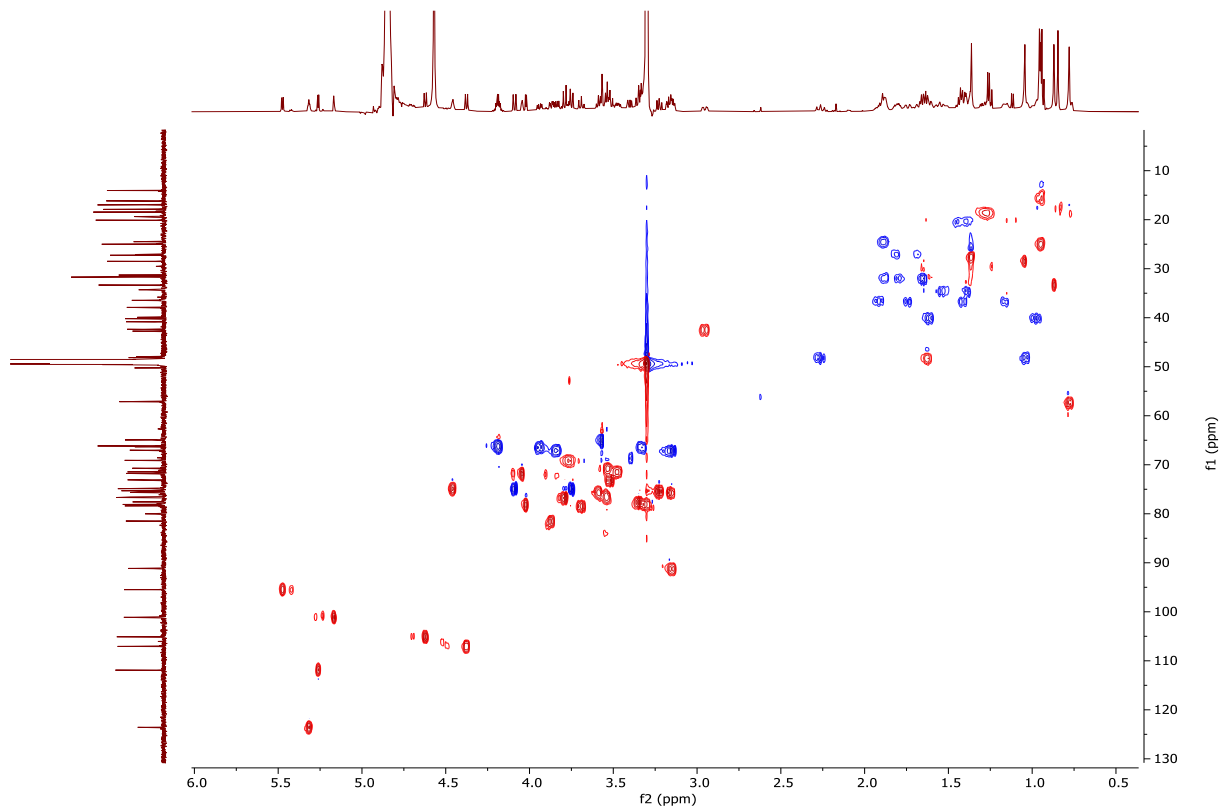

**Figure S10.** HSQC spectrum of compound **1**

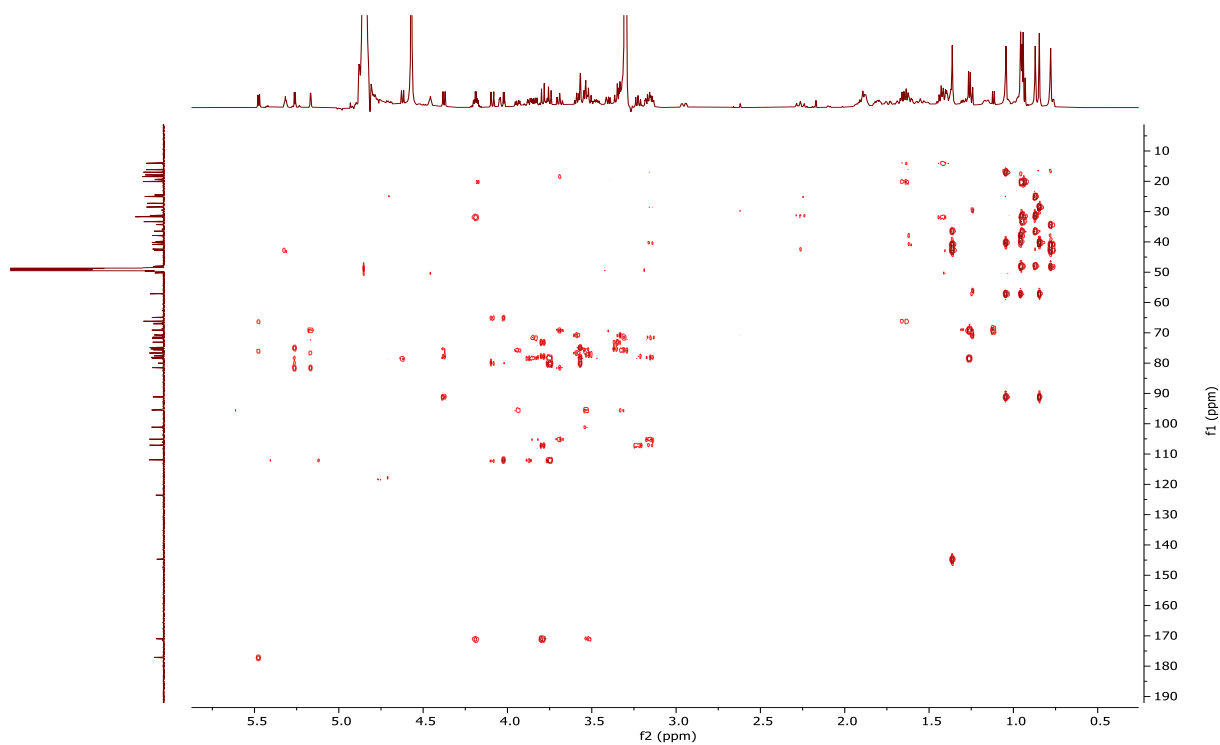

**Figure S11.** HMBC spectrum of compound **1**

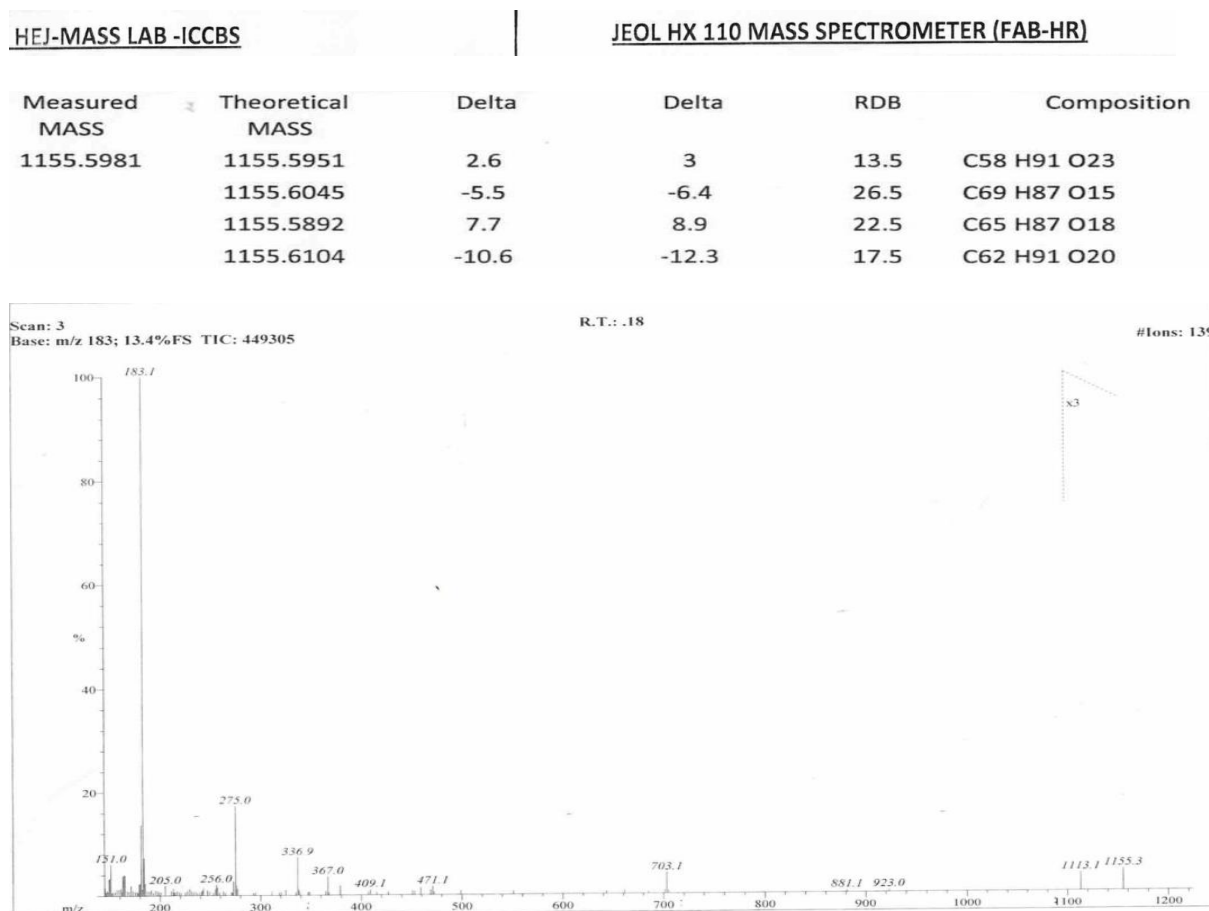

**Figure S12.** HRFABMS spectrum of compound **2/3**

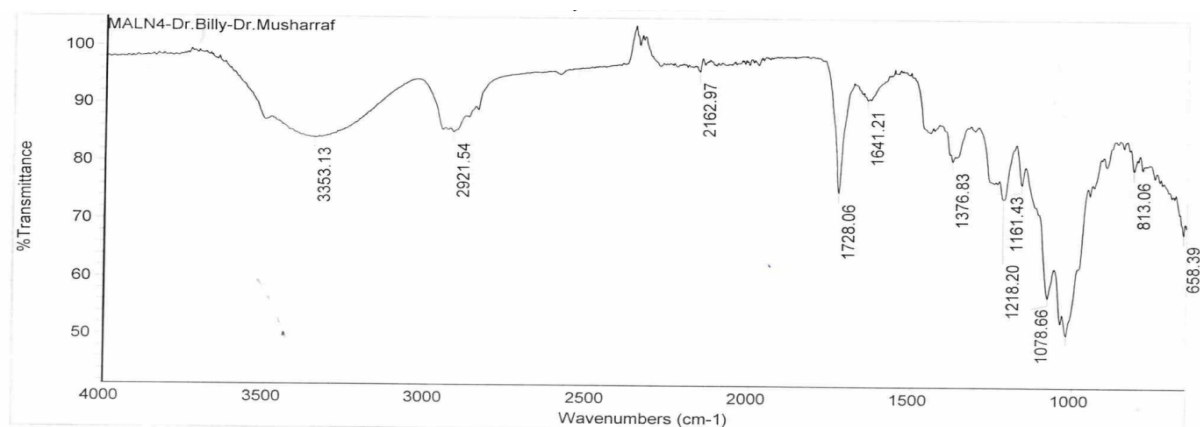

**Figure S13.** IR spectrum of compound 2/3

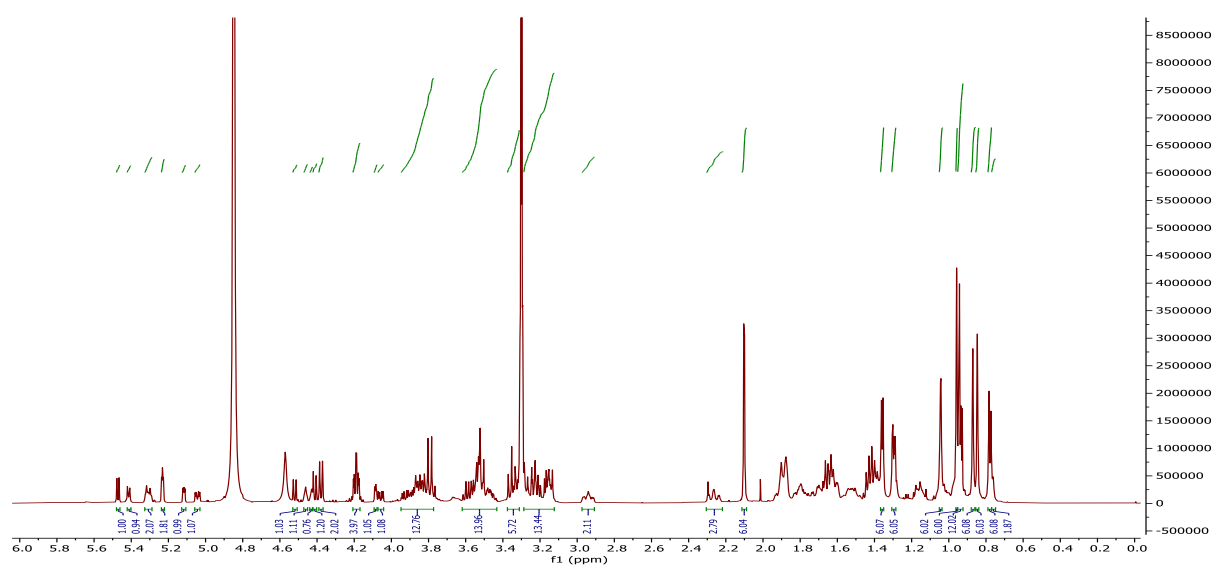

**Figure S14.** <sup>1</sup>H NMR (600 MHz, CD<sub>3</sub>OD) spectrum of compound 2/3

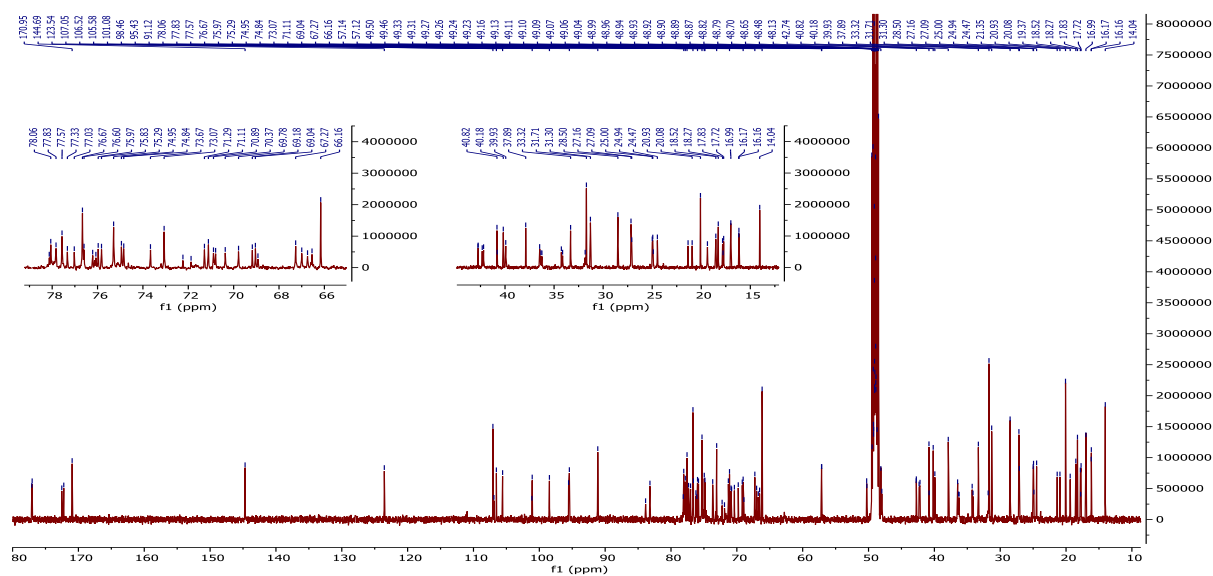

**Figure S15.** <sup>13</sup>C NMR (150 MHz, CD<sub>3</sub>OD) spectrum of compound 2/3

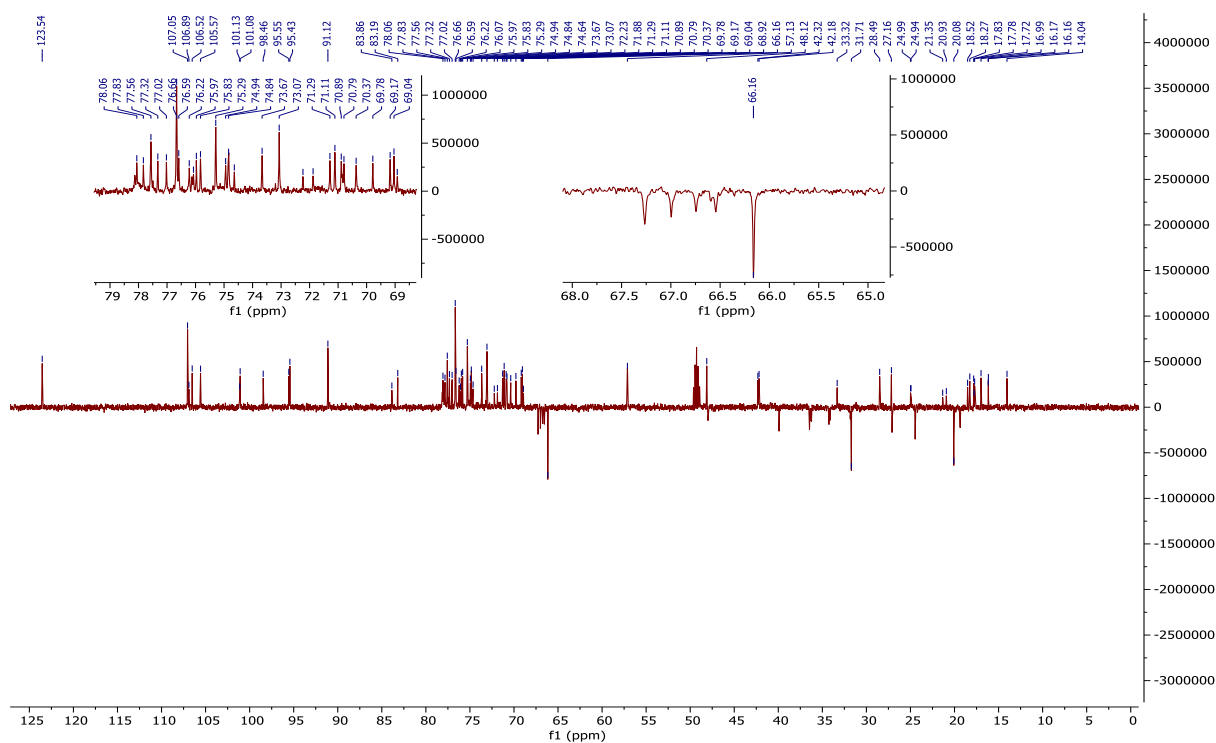

**Figure S16.** DEPT 135 spectrum of compound 2/3

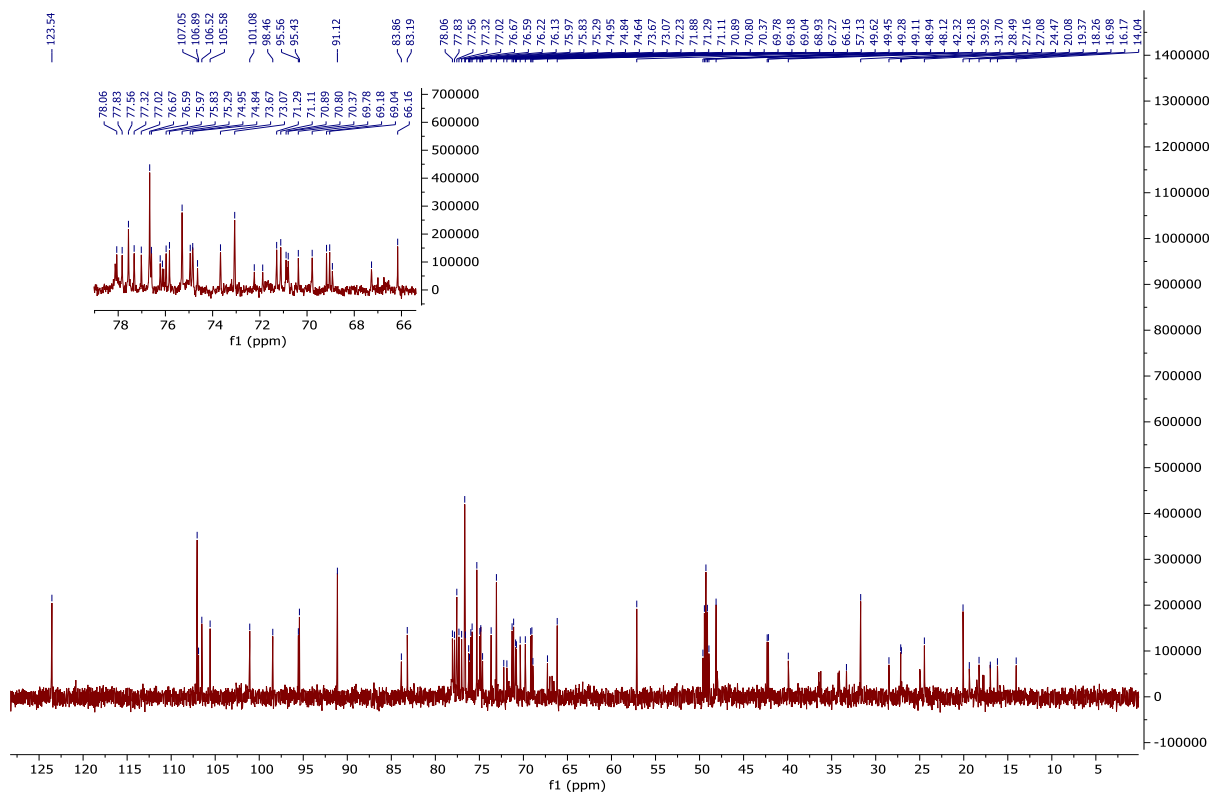

**Figure S17.** DEPT 90 spectrum of compound 2/3

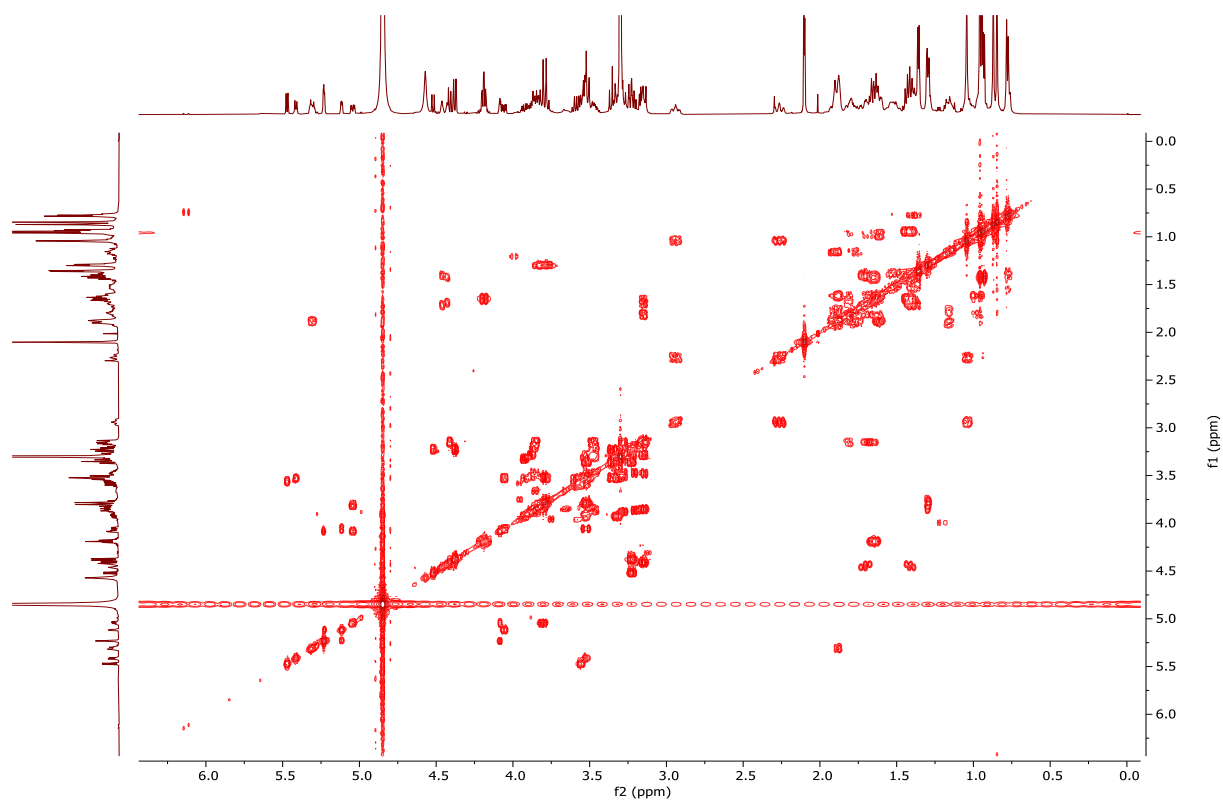

**Figure S18.**  $^1\text{H}$ - $^1\text{H}$  COSY spectrum of compound **2/3**

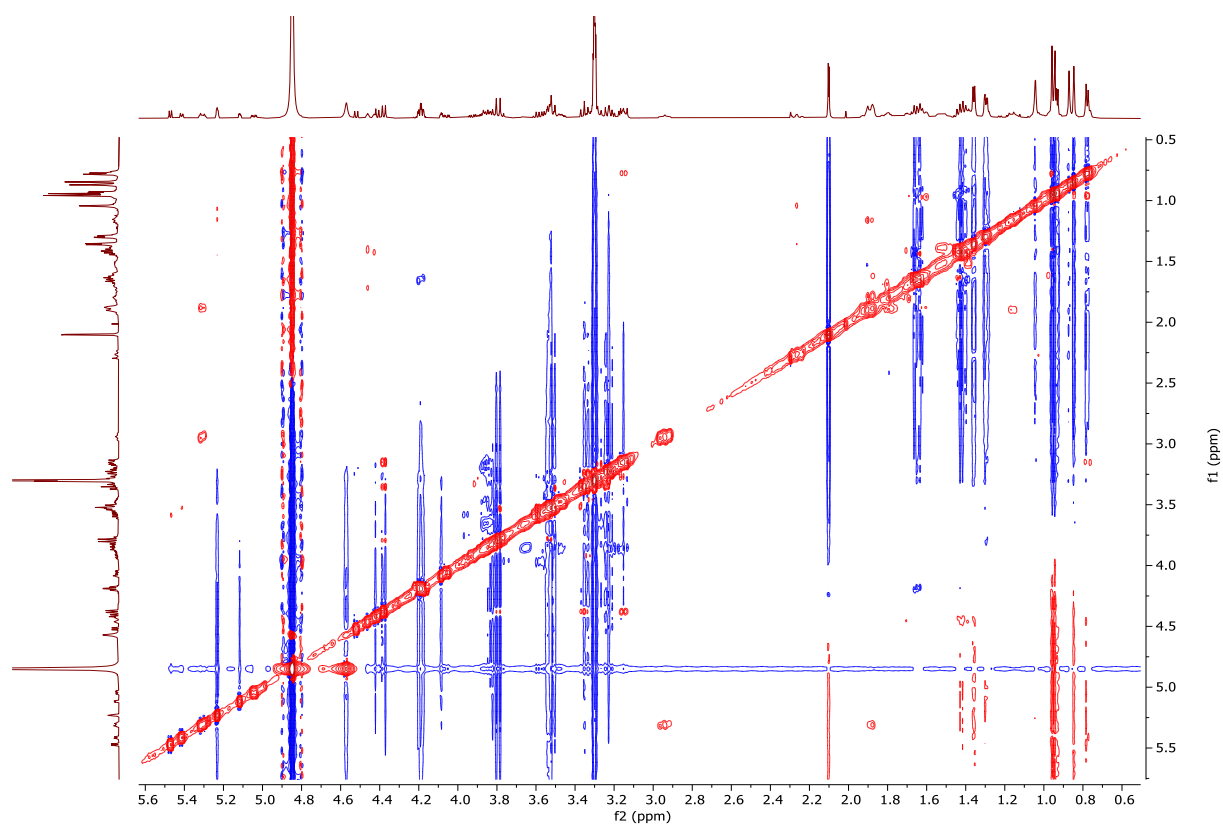

**Figure S19.** NOESY spectrum of compound **2/3**

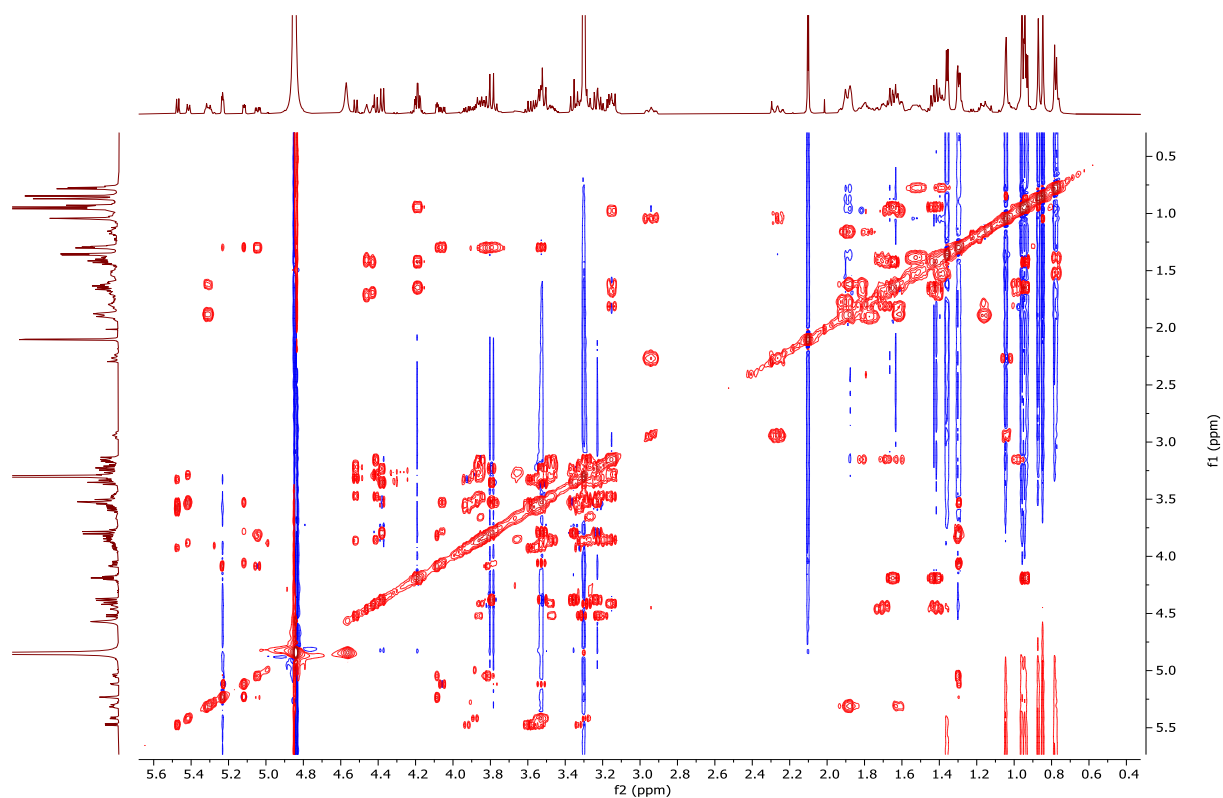

**Figure S20.** TOCSY spectrum of compound 2/3

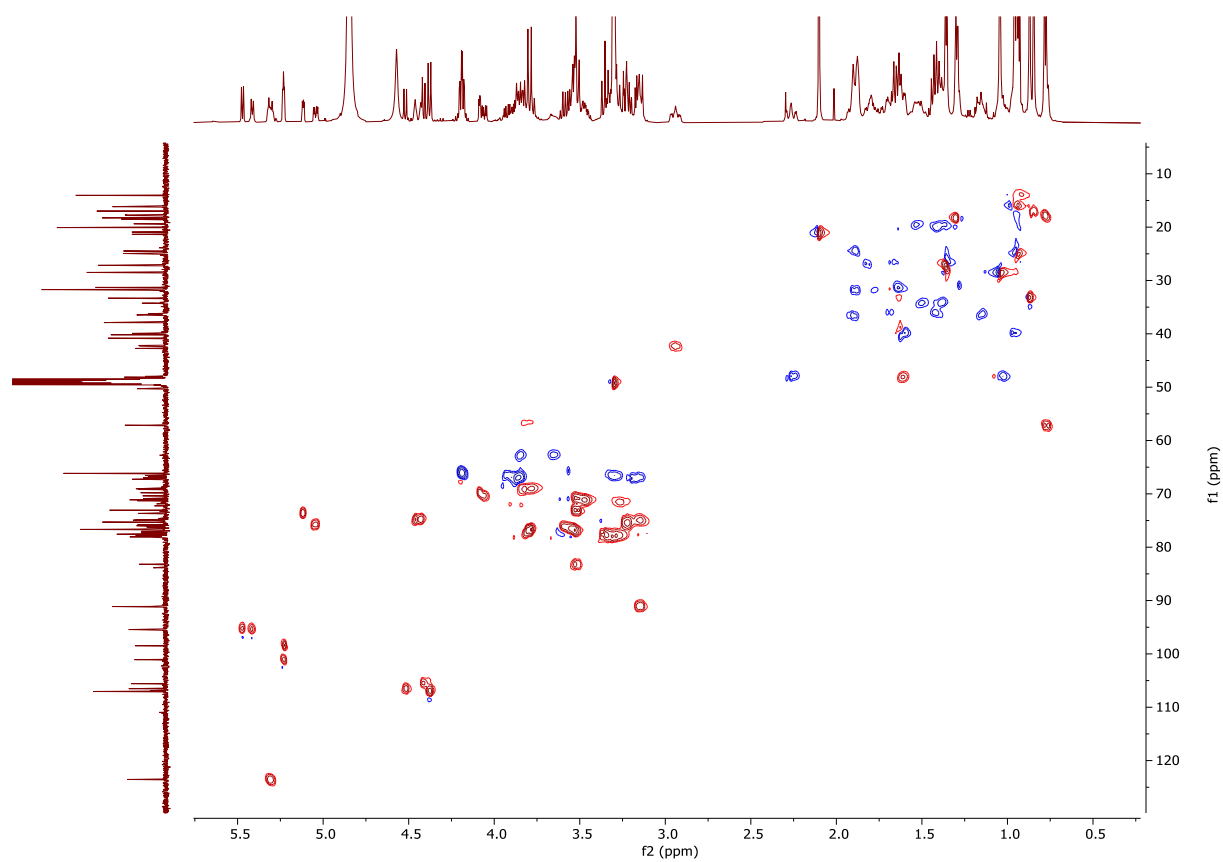

**Figure S21.** HSQC spectrum of compound 2/3

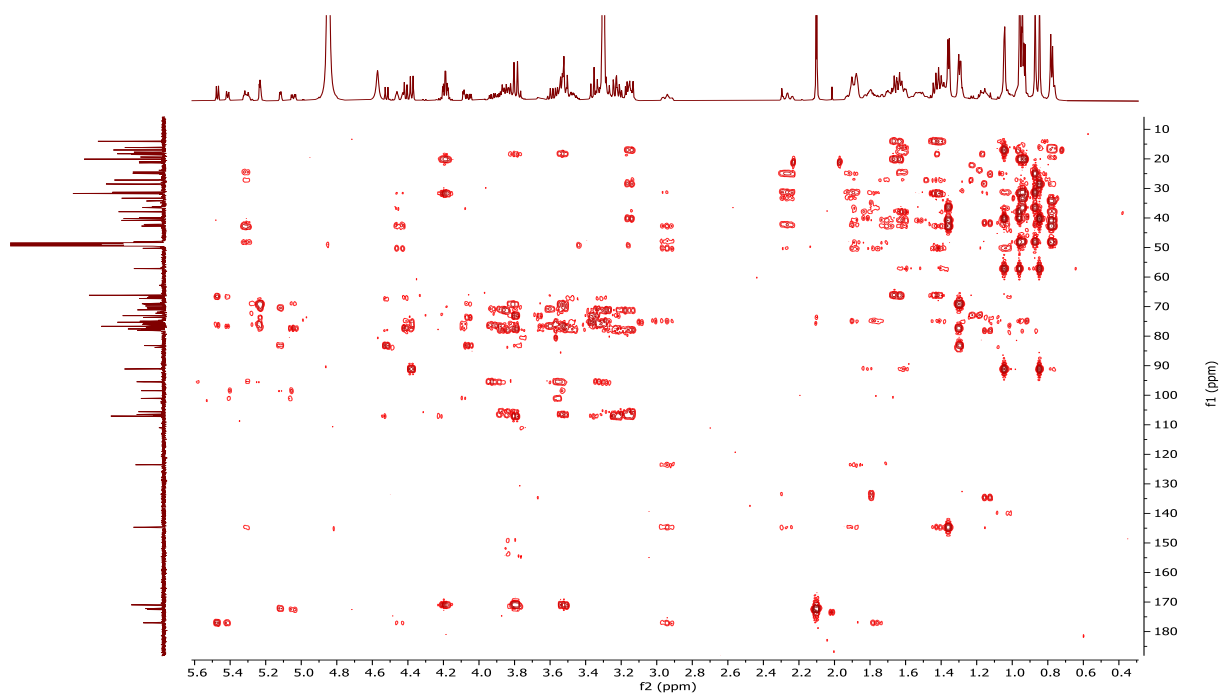

**Figure S22.** HMBC spectrum of compound **2/3**

| HEJ-MASS LAB -ICCBS |                  |       | JEOL HX 110 MASS SPECTROMETER (FAB-HR) |      |             |
|---------------------|------------------|-------|----------------------------------------|------|-------------|
| Measured MASS       | Theoretical MASS | Delta | Delta                                  | RDB  | Composition |
| 1099.5355           | 1099.536         | -0.5  | -0.5                                   | 35.5 | C72 H75 O10 |
|                     | 1099.5325        | 2.7   | 3                                      | 13.5 | C54 H83 O23 |
|                     | 1099.5266        | 8.1   | 8.9                                    | 22.5 | C61 H79 O18 |
|                     | 1099.5478        | -11.2 | -12.3                                  | 17.5 | C58 H83 O20 |

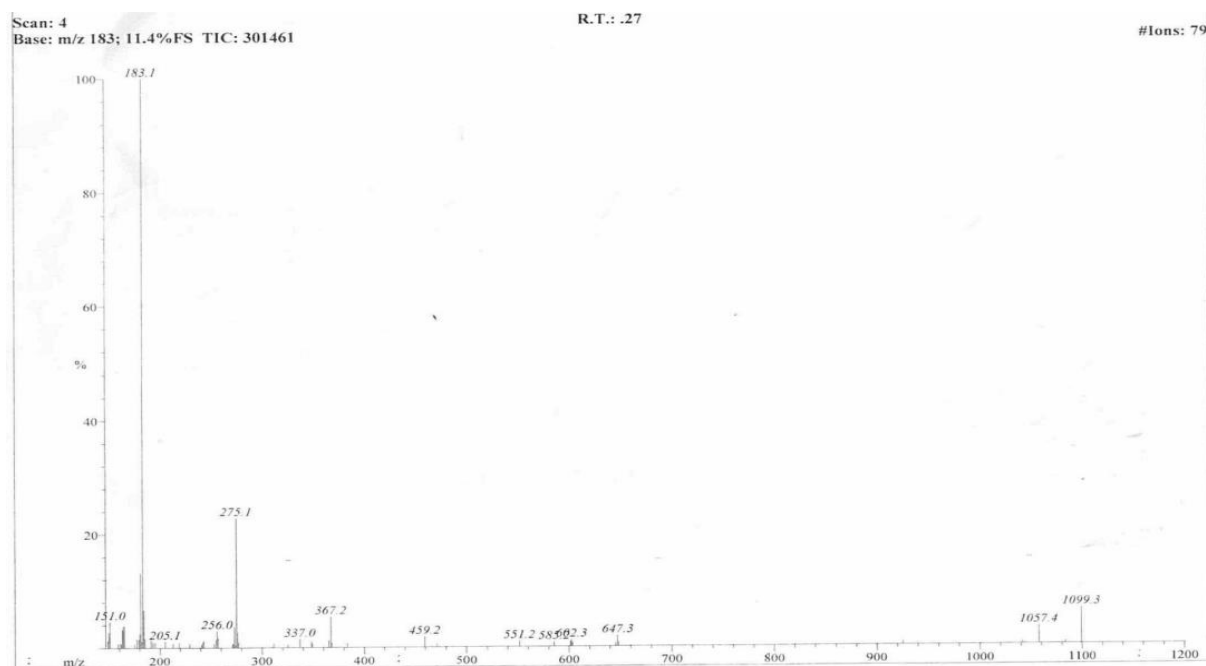

**Figure S23.** HRFABMS spectrum of compound **4/5**

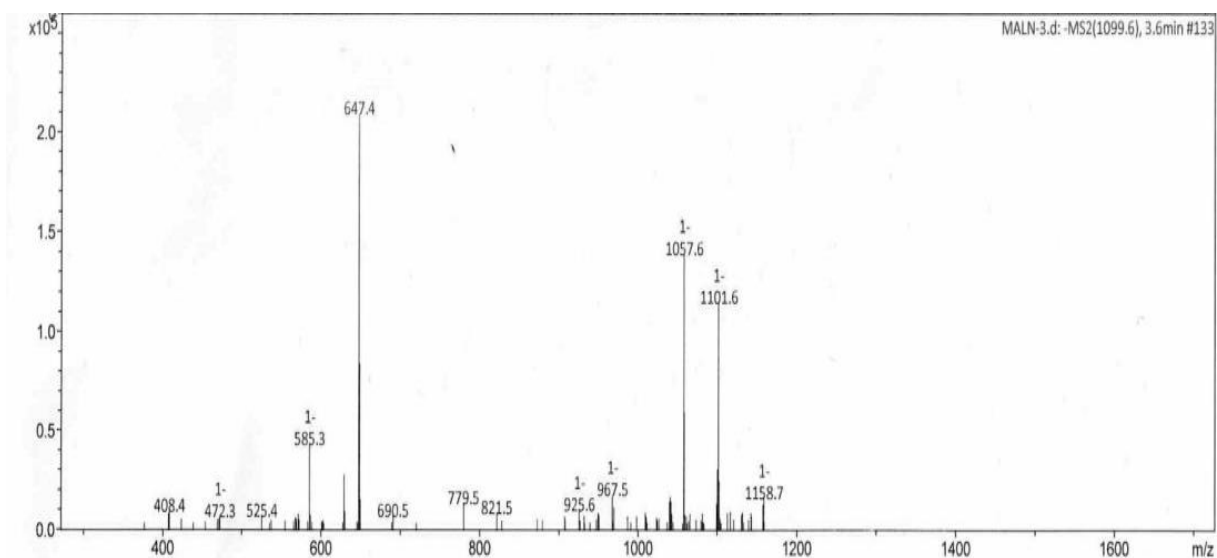

**Figure S24.** ESI-MS<sup>2</sup> spectrum of  $m/z = 1099.6$  of compound **4/5**

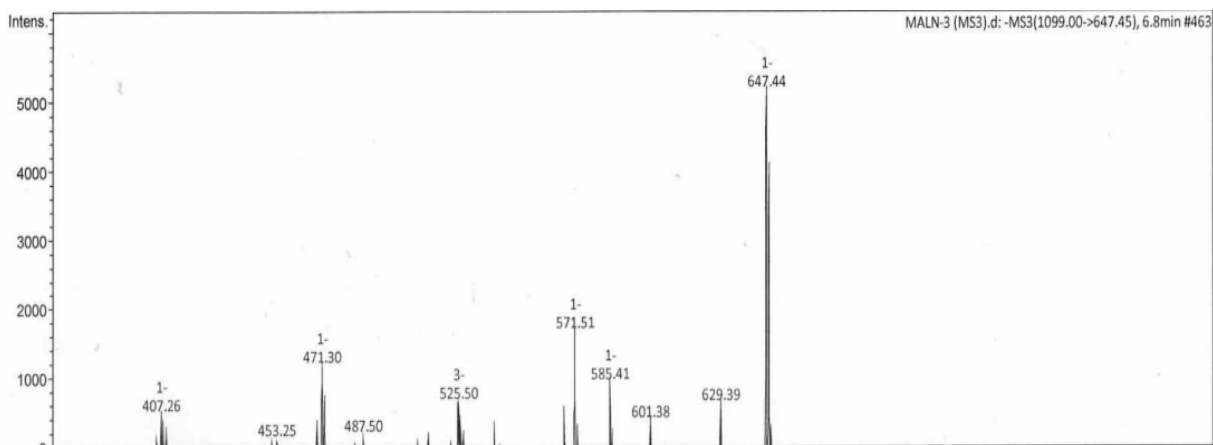

**Figure S25.** ESI-MS<sup>3</sup> spectrum of  $m/z = 647.4$  of compound **4/5**

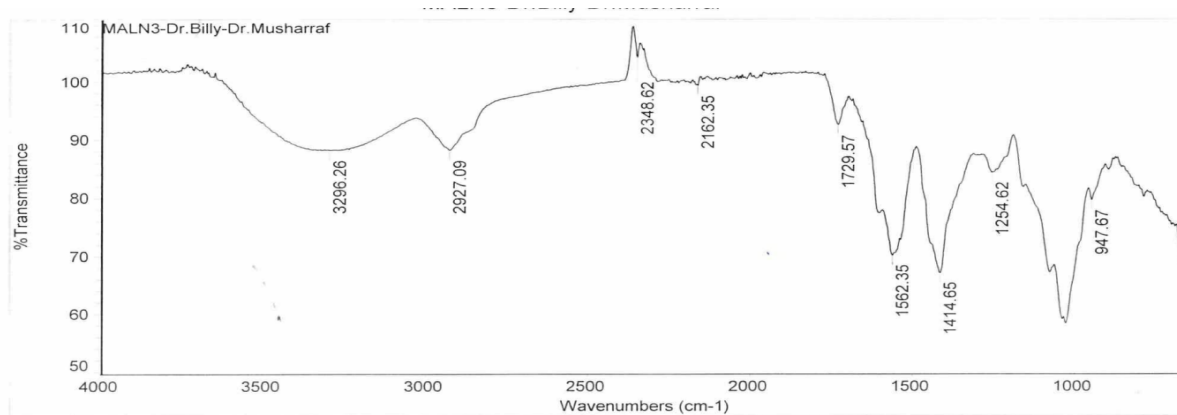

**Figure S26.** IR spectrum of compound **4/5**

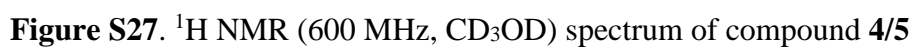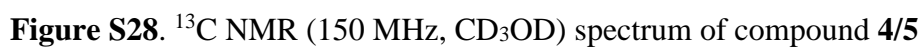

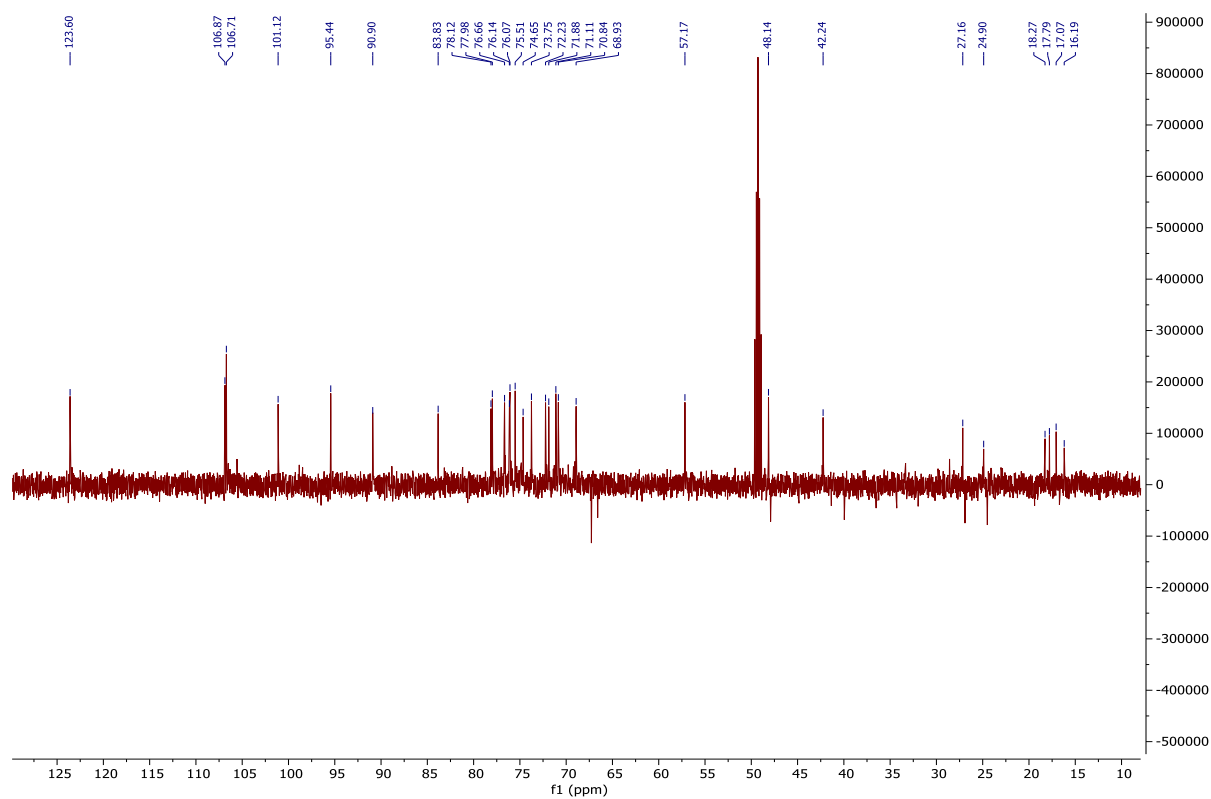

**Figure S29.** DEPT 135 spectrum of compound 4/5

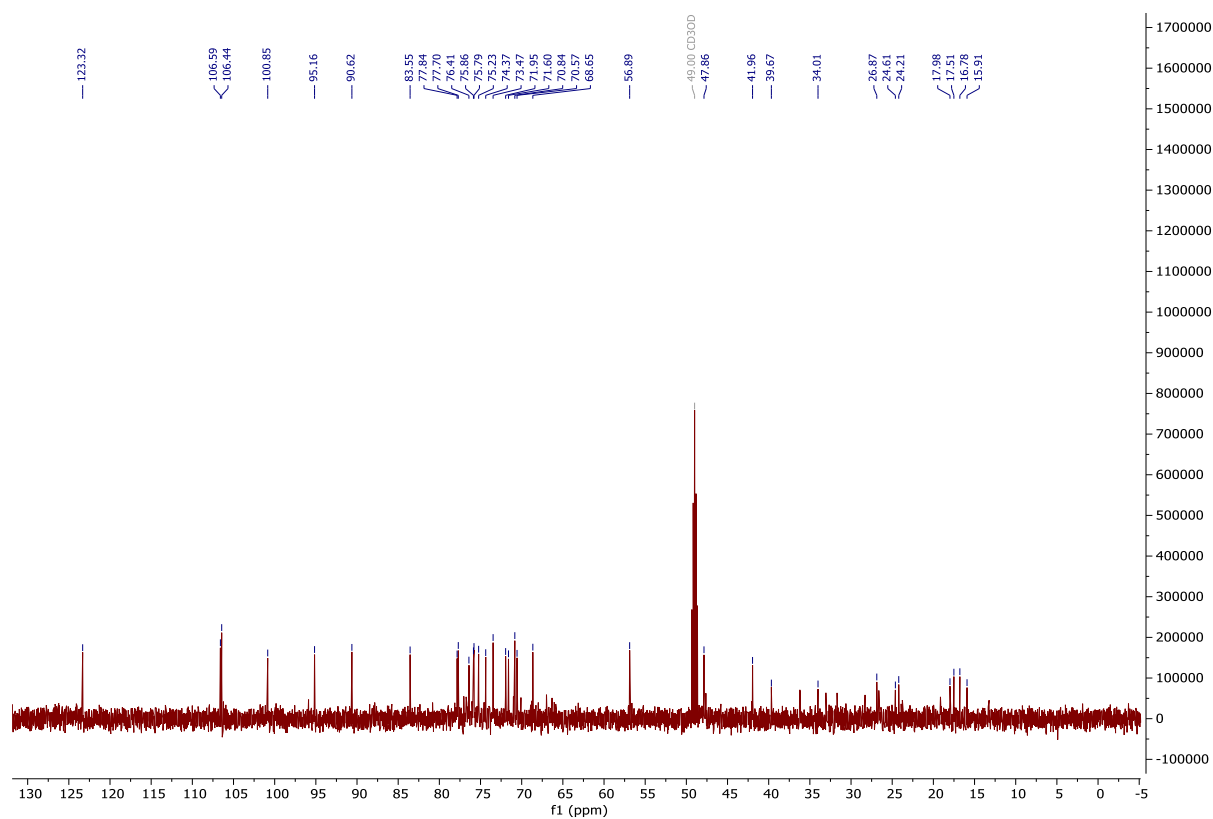

**Figure S30.** DEPT 90 spectrum of compound 4/5

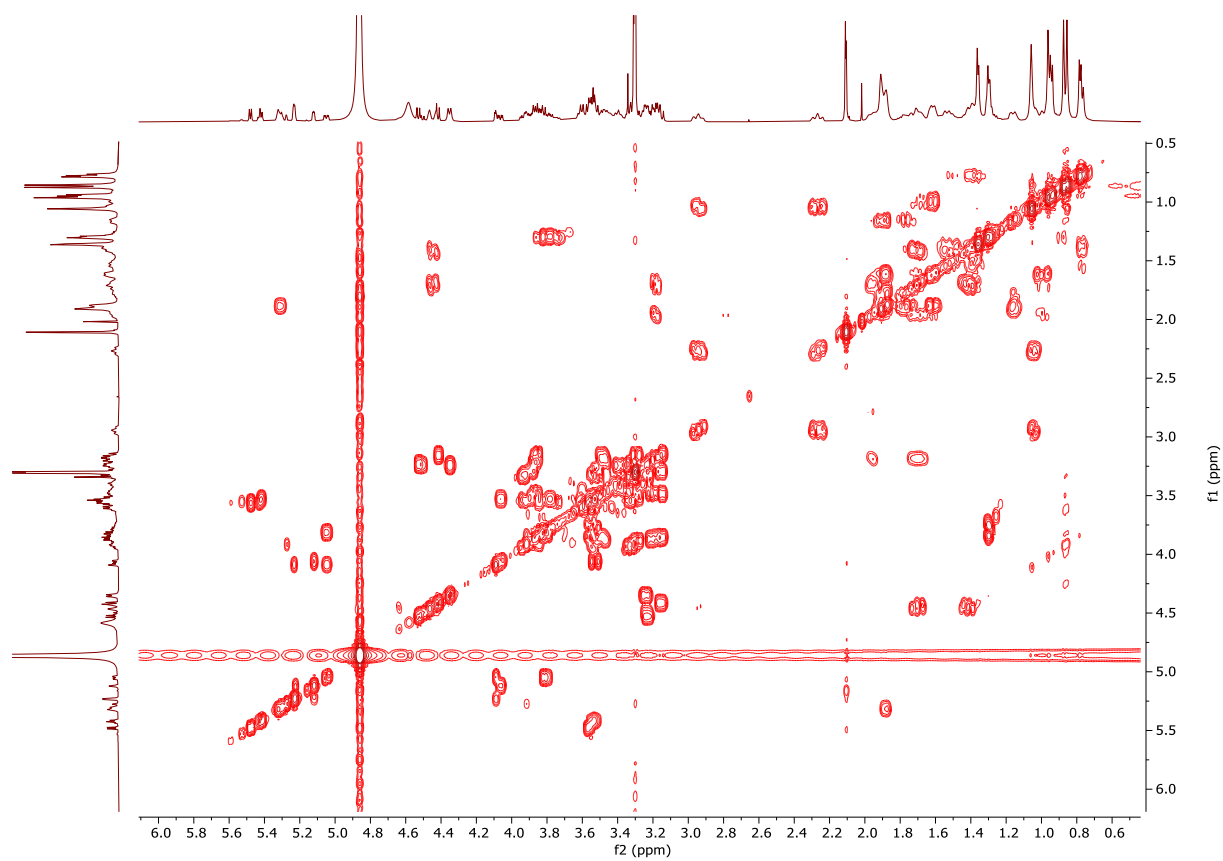

**Figure S31.**  $^1\text{H}$ - $^1\text{H}$  COSY spectrum of compound **4/5**

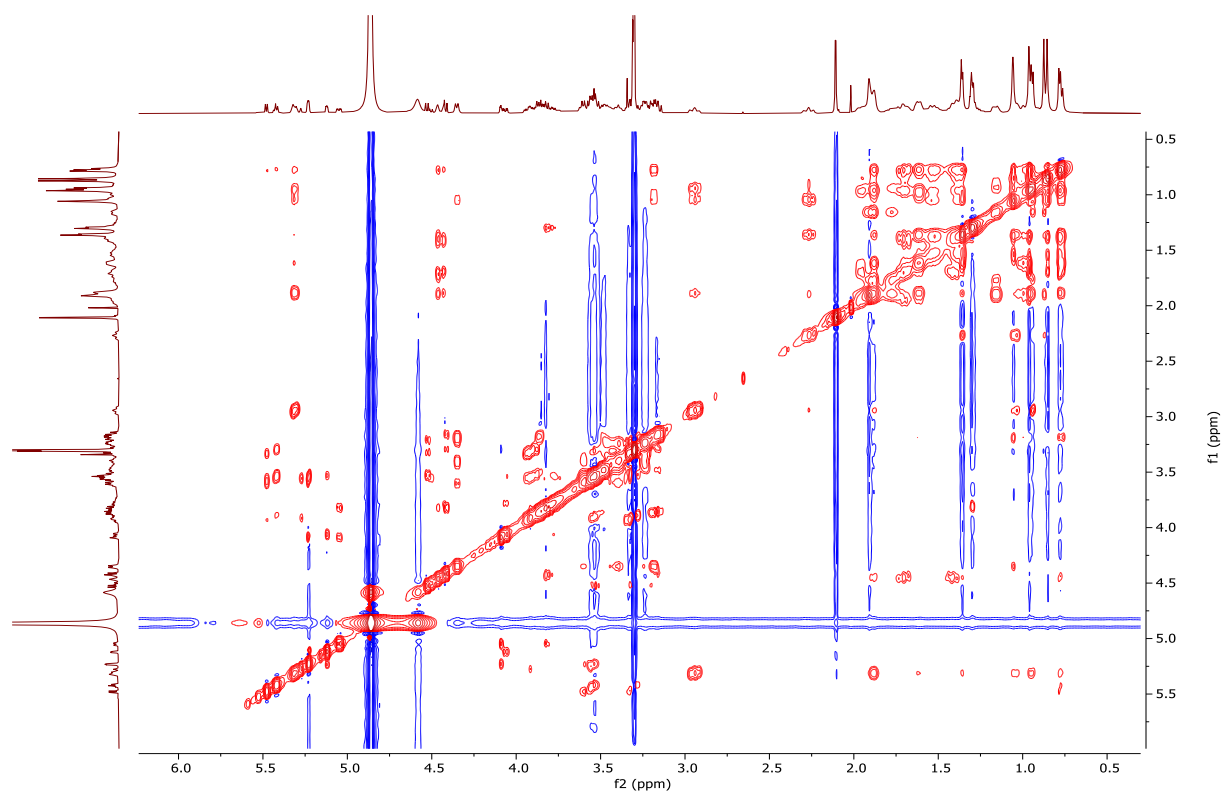

**Figure S32.** NOESY spectrum of compound **4/5**

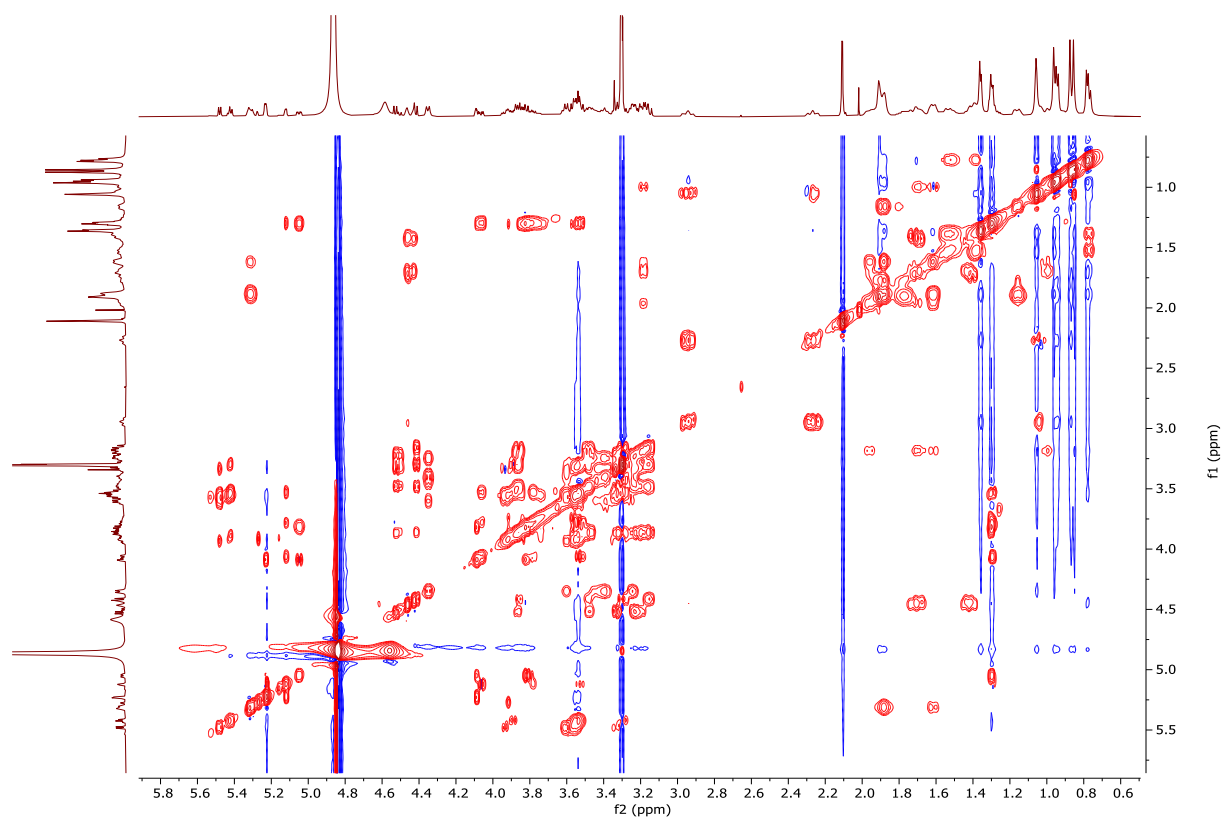

**Figure S33.** TOCSY spectrum of compound 4/5

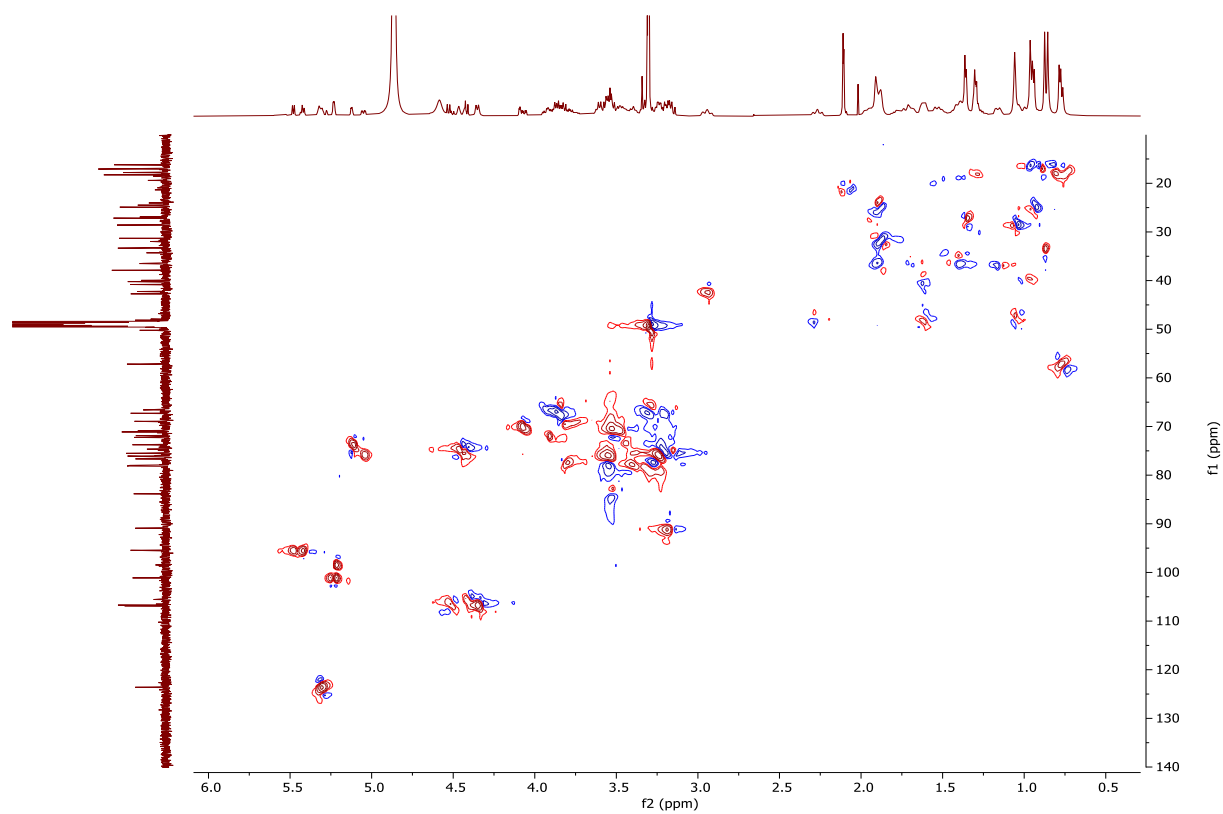

**Figure S34.** HSQC spectrum of compound 4/5

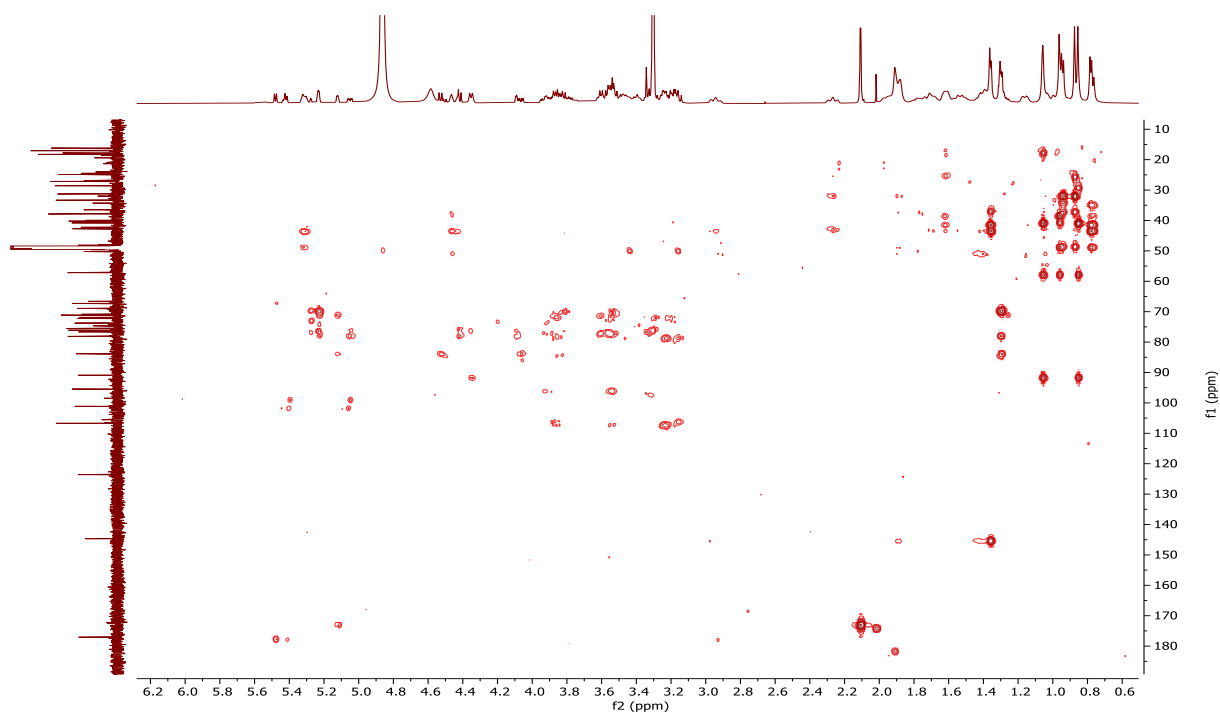

**Figure S35.** HMBC spectrum of compound **4/5**

HEJ-MASS LAB -ICCBS

JEOL HX 110 MASS SPECTROMETER (FAB-HR)

| Measured<br>MASS | Theoretical<br>MASS | Delta<br>[ppm] | Delta<br>[mmu] | RDB  | Composition |
|------------------|---------------------|----------------|----------------|------|-------------|
| 967.4951         | 967.4938            | 1.4            | 1.3            | 34.5 | C67 H67 O6  |
|                  | 967.4996            | -4.7           | -4.5           | 25.5 | C60 H71 O11 |
|                  | 967.4903            | 5              | 4.8            | 12.5 | C49 H75 O19 |
|                  | 967.5055            | -10.8          | -10.4          | 16.5 | C53 H75 O16 |
|                  | 967.4844            | 11.1           | 10.7           | 21.5 | C56 H71 O14 |
|                  | 967.509             | -14.4          | -13.9          | 38.5 | C71 H67 O3  |

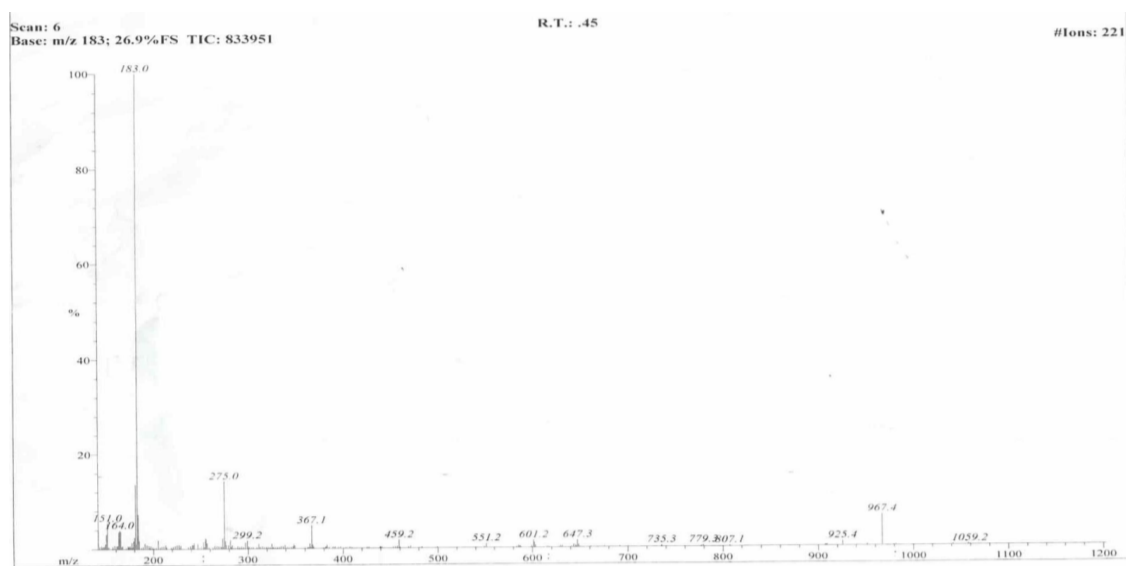

**Figure S36.** HRFABMS spectrum of compounds **6–8**

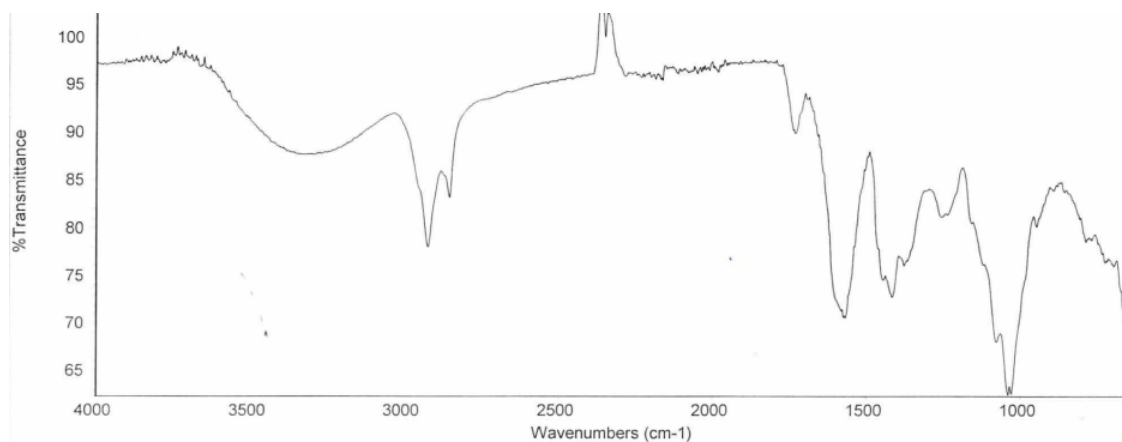

**Figure S37.** IR spectrum of compound 6-8

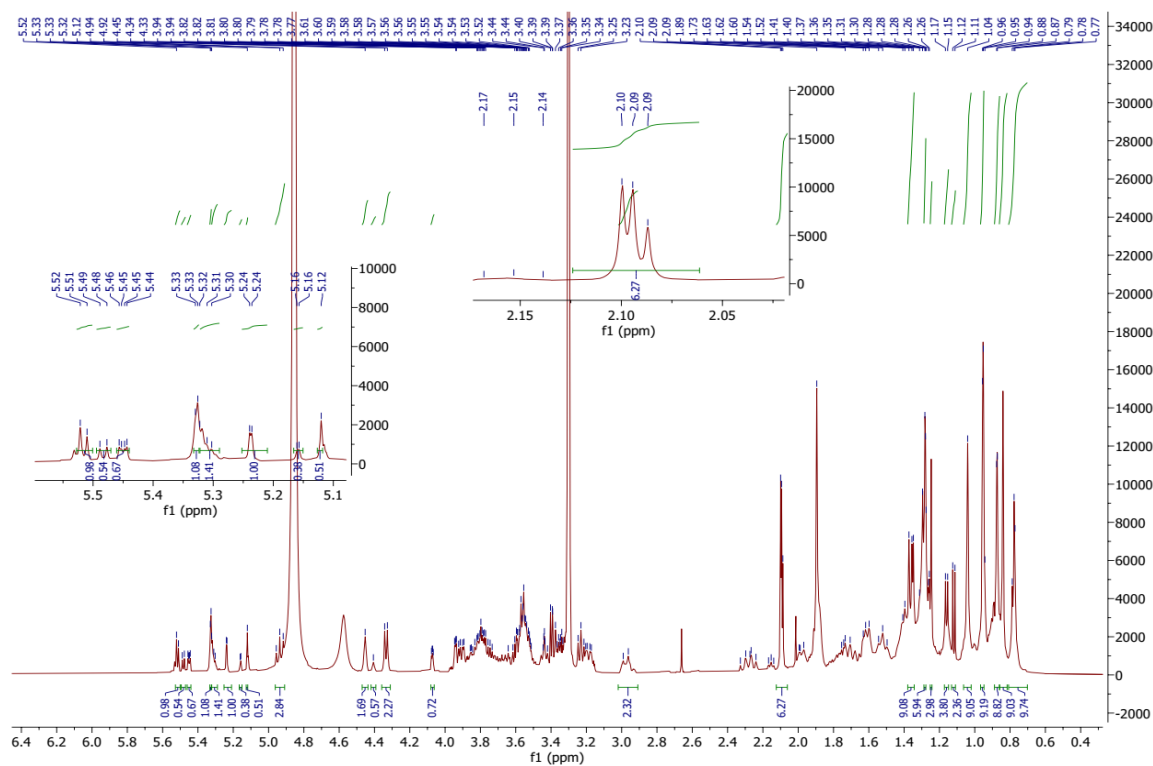

**Figure S38.** <sup>1</sup>H NMR (800 MHz, CD<sub>3</sub>OD) spectrum of compound 6-8

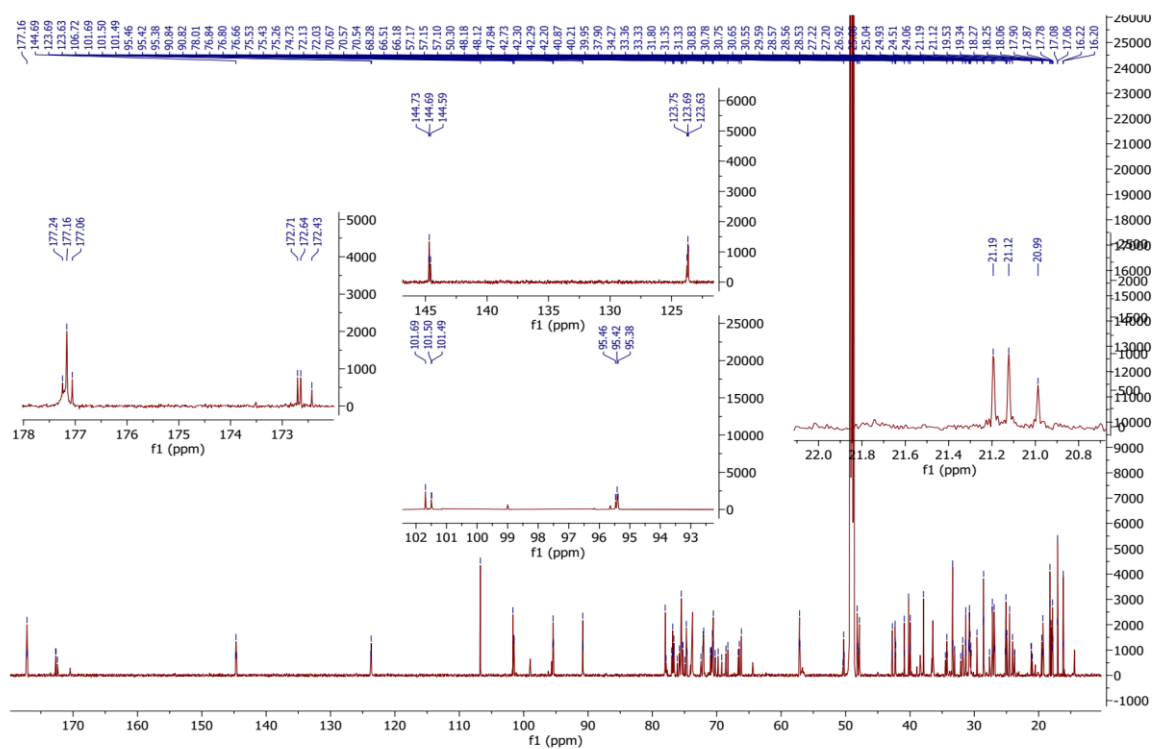

**Figure S39.**  $^1\text{H}$  NMR (200 MHz,  $\text{CD}_3\text{OD}$ ) spectrum of compound 6-8

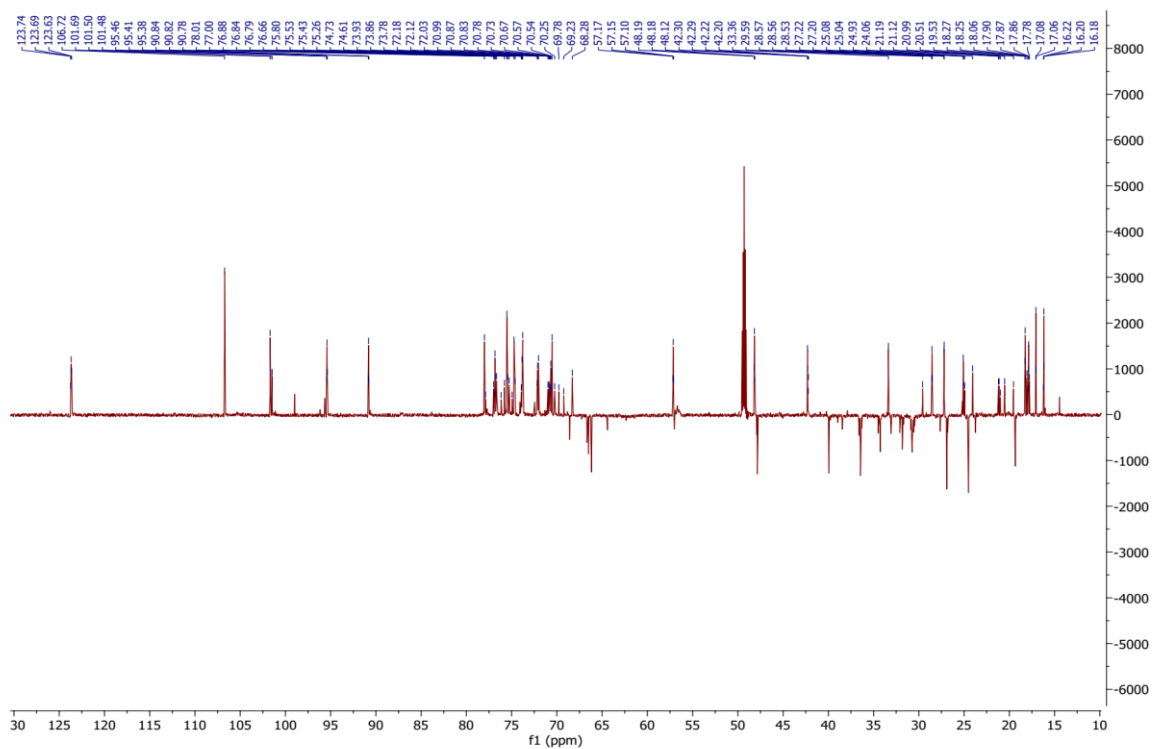

**Figure S40.** DEPT 135 spectrum of compound 6-8

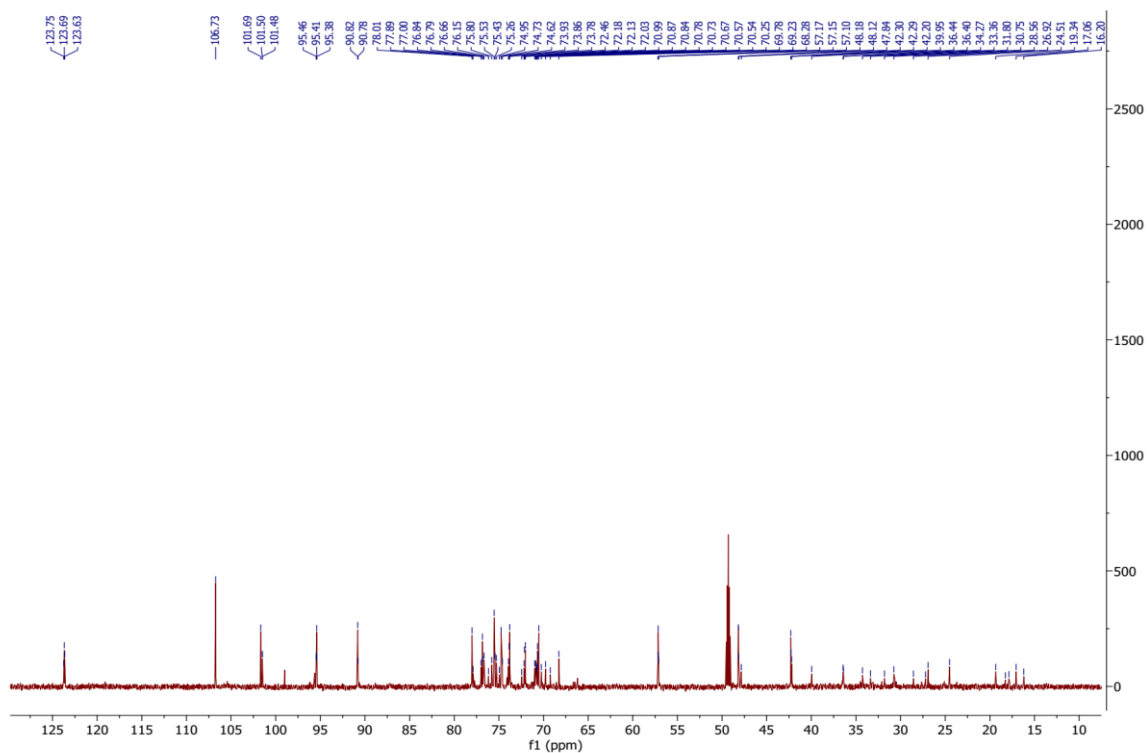

**Figure S41.** DEPT 90 spectrum of compound 6–8

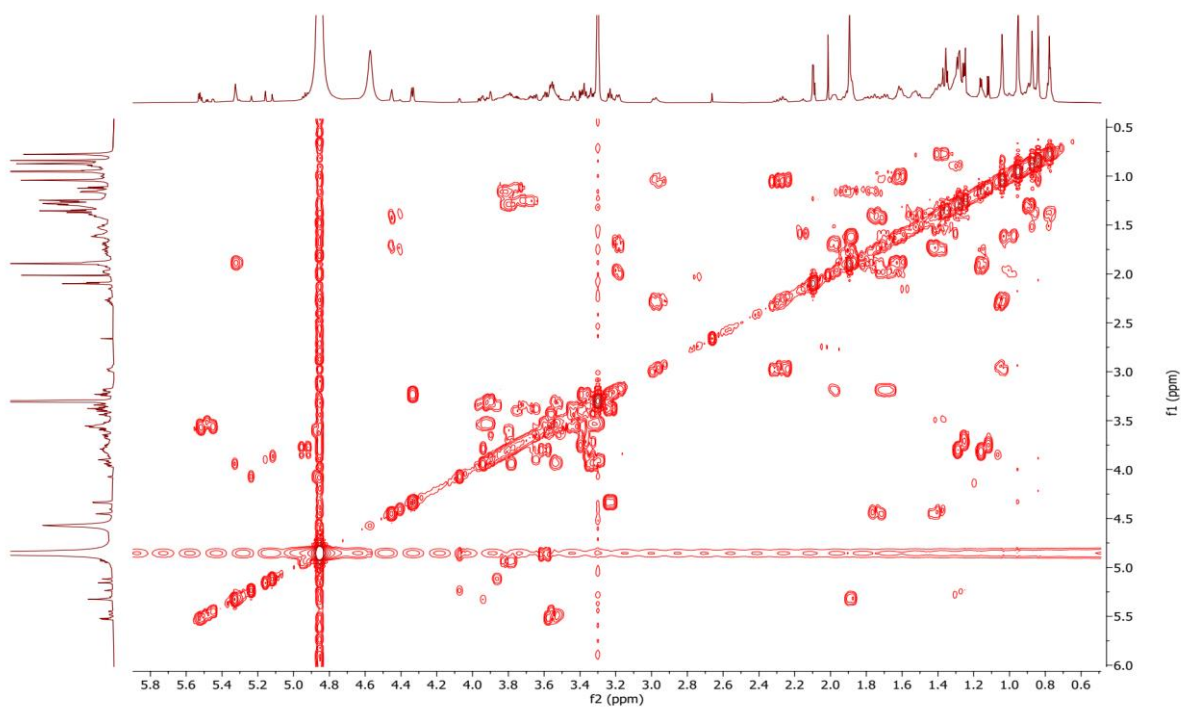

**Figure S42.**  $^1\text{H}$ – $^1\text{H}$  COSY spectrum of compound 6–8

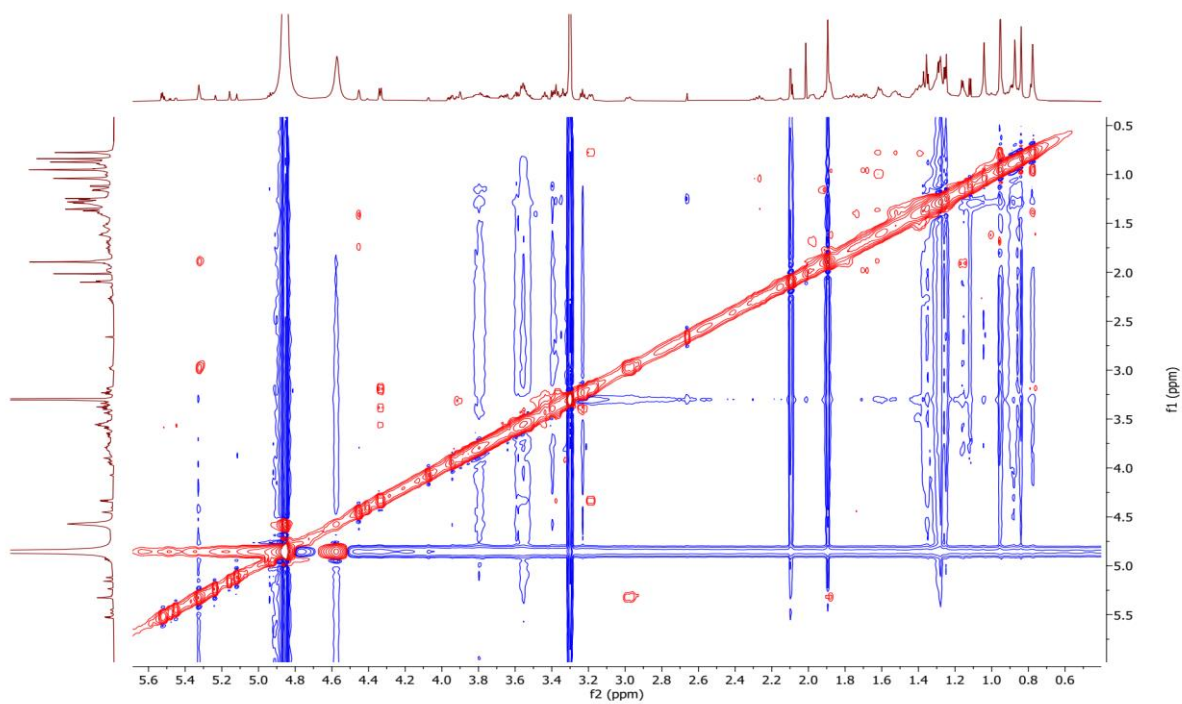

**Figure S43.** NOESY spectrum of compound 6-8

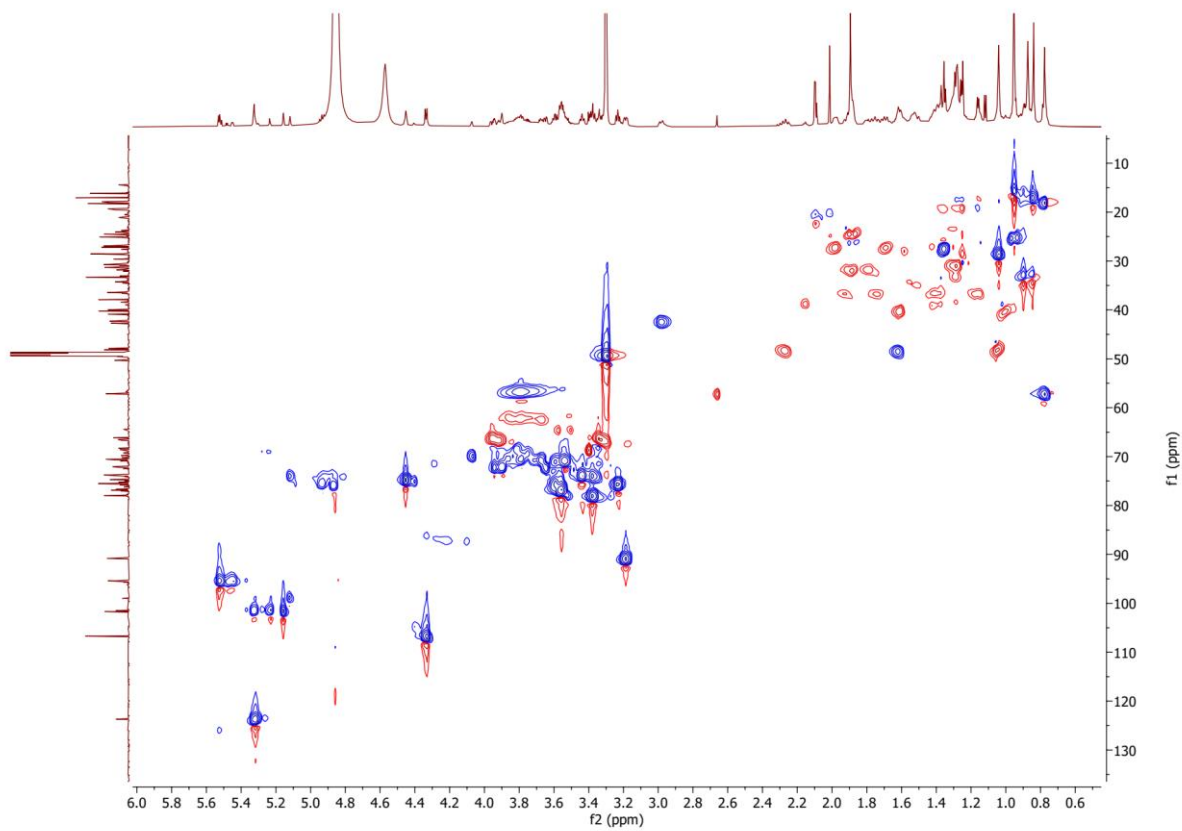

**Figure S44.** HSQC spectrum of compound 6-8

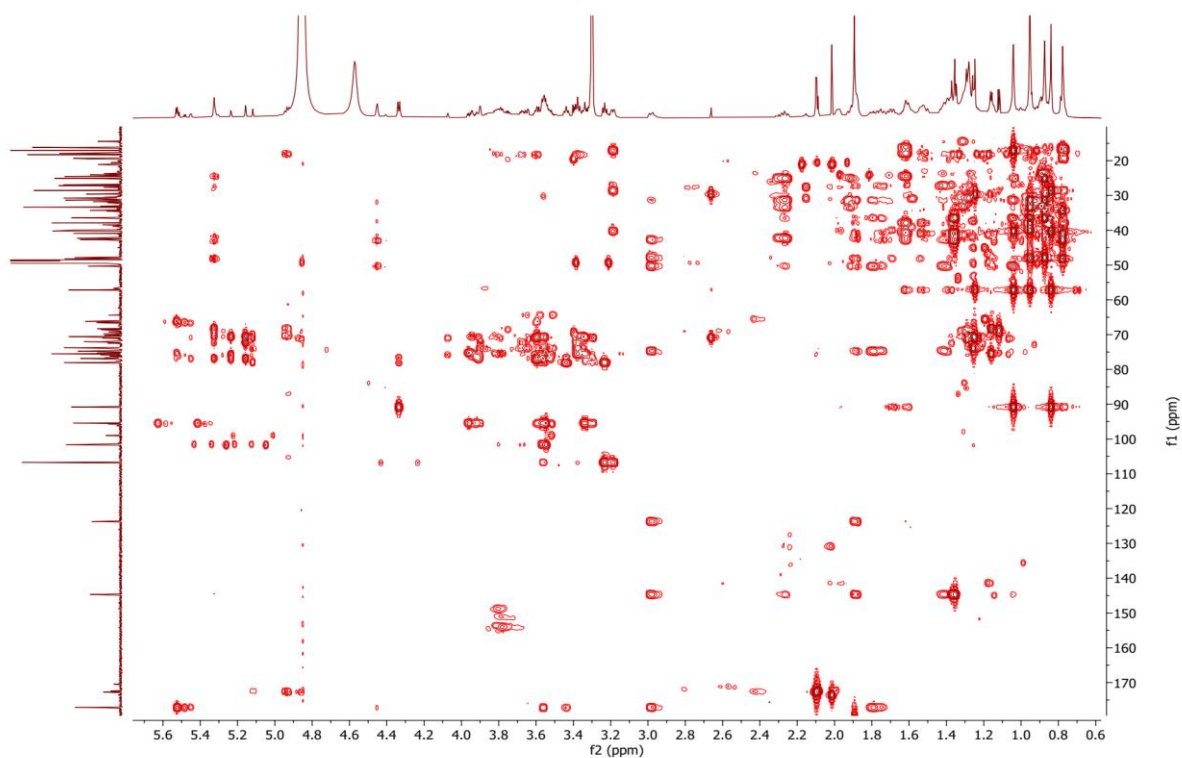

**Figure S45.** HBMC spectrum of compound 6–8

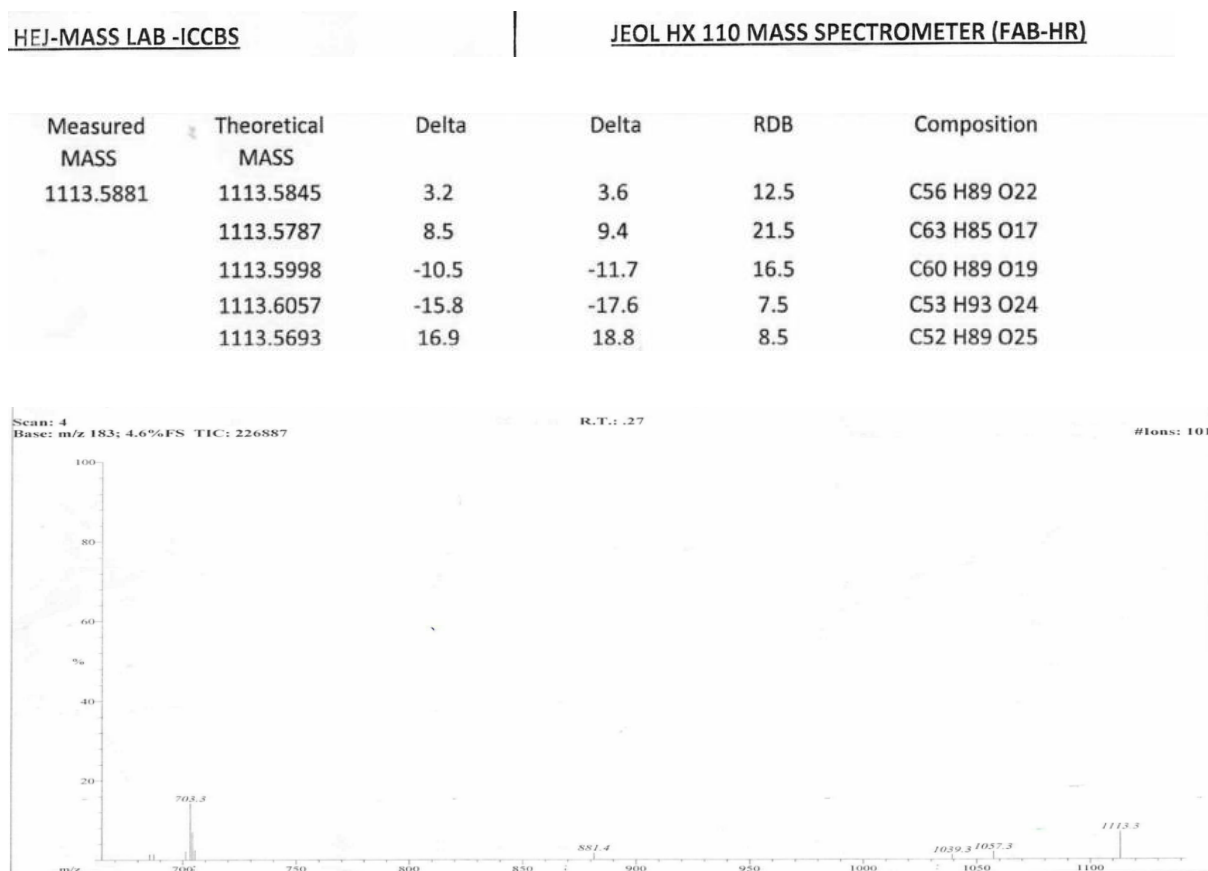

**Figure S46.** HRFABMS spectrum of compound 9

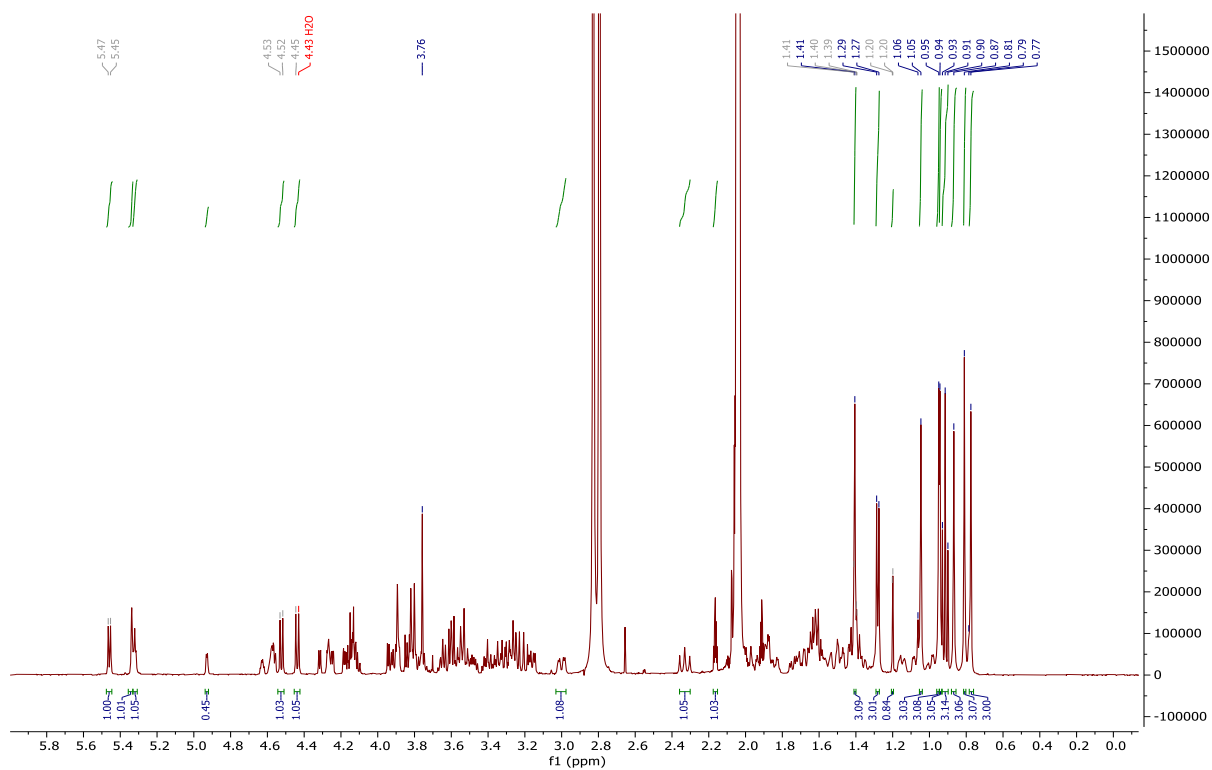

**Figure S47.** <sup>1</sup>H NMR (600 MHz, CD<sub>3</sub>OD) spectrum of compound **9**

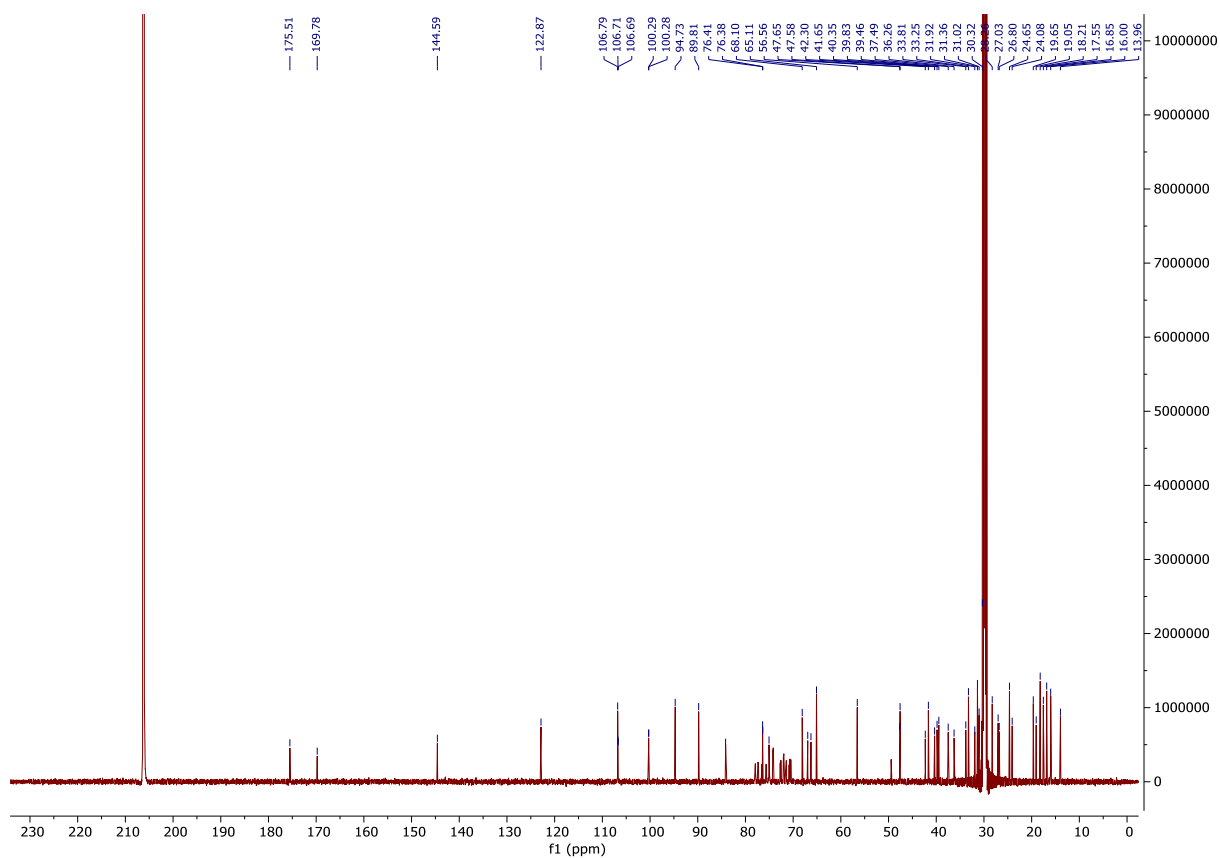

**Figure S48.** <sup>13</sup>C NMR (150 MHz, CD<sub>3</sub>OD) spectrum of compound **9**

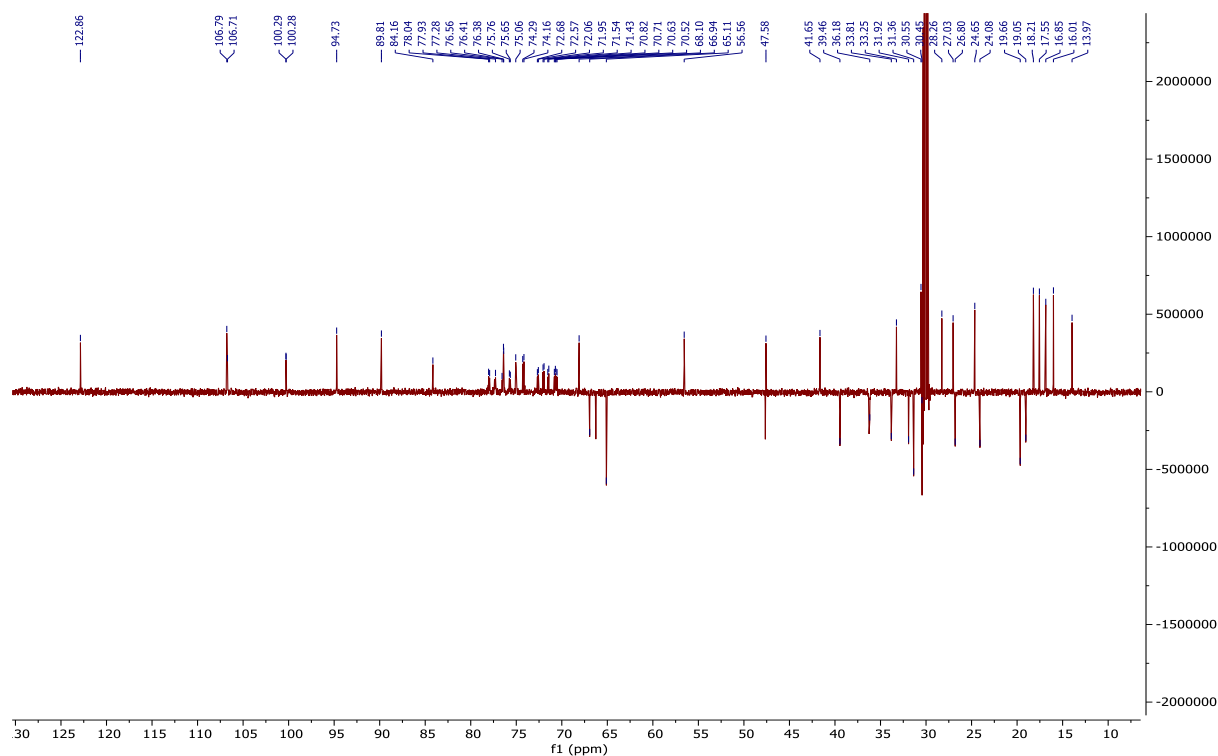

**Figure S49.** DEPT 135 spectrum of compound **9**

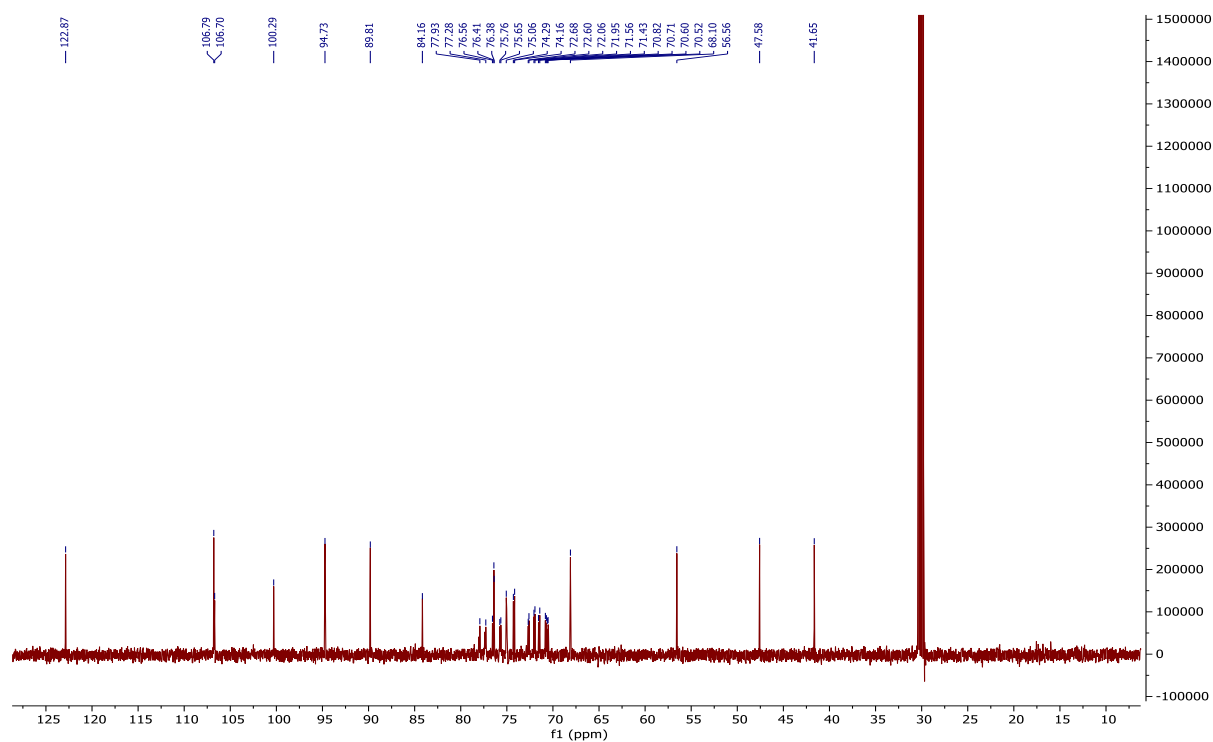

**Figure S50.** DEPT 90 spectrum of compound **9**

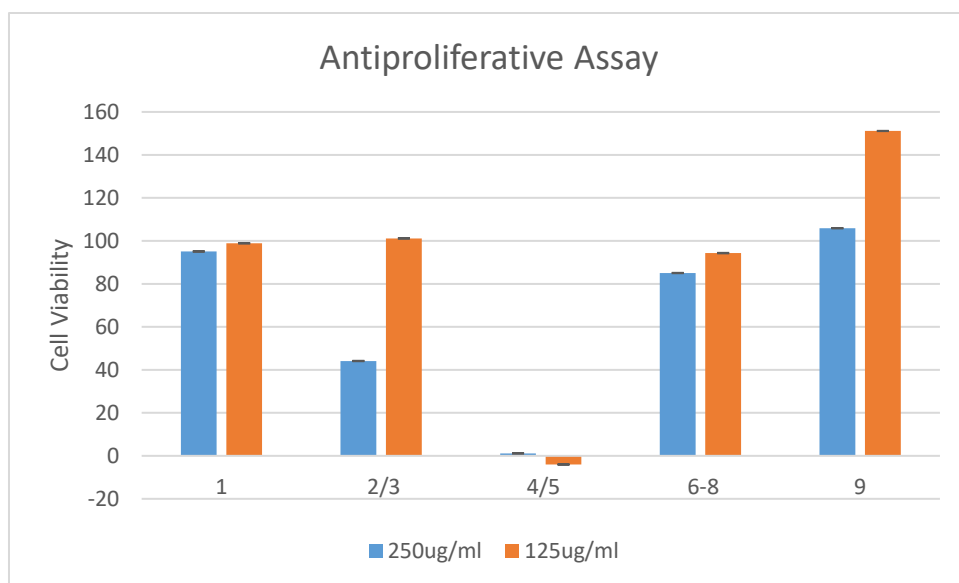

**Figure S51.** Cell viability of all tested compounds.
